# Supplementary material for: Severe community-acquired pneumonia in Reunion Island: Epidemiological, clinical, and microbiological characteristics, 2016–2018
Source: PLoS One. 2022 Apr 15;17(4):e0267184. doi: 10.1371/journal.pone.0267184 (PMC9012352; doi:10.1371/journal.pone.0267184)
Supplement: S1 Dataset — (XLS) [file pone.0267184.s001.xls]

## Sheet: general data
patient	Male sex (n/%)	Age (years) (median [25th-75th percentiles]	simplified acute physiology score (median [25th-75th percentiles]	Flu syndrome n/%	Onset of symptoms before ICU admission (days) (median [25th-75th percentiles]	Influenza	CURB 65 (median [25th-75th percentiles]	immunodepression n(%)	corticosteroids n(%)	Hazardous alcohol use n (%)	COPD n(%)	Asthma	Hypertension n(%)	Chronic kidney failure n(%)	Diabetes mellitus n(%)	Liver cirrhosis n(%)	neoplasia< 6 MOIS n(%)	History of congestive heart failure n(%)	Pregnant n(%)	ECMO n (%)	Invasive mechanical ventilation n (%)	non invasive mechanical ventilation n(%)	Optiflow n(%)	dialysis or CVVH n(%)	Temperature median [25-75th percentiles]	Catecholamines (n(%)	Glasgow [25-75th percentiles]	Creatinin level [25-75th percentiles]	bilirubin [25-75th percentiles]	prothrombin time (%) [25-75th percentiles]	Platelet count [25-75th percentiles]	leucocytes count [25-75th percentiles]	Lactate level [25-75th percentiles]	Hemoglobin [25-75th percentiles]	In ICU death (%)
Total CAP	376 (65.7%)	62 [52-73]	53 (28-68]	175 (30.6%)	2 [1-5]	125	3 [2-3]	47 (8.2%)	53 (9.3%)	159 (27.8%)	144 (25.2%)	33 (5.8%)	248 (43.3%)	28 (4.9%)	197 (3.4%)	22 (3.8%)	51 (8.9%)	114 (19.9%)	7 (1.2%)	21 (3.7%)	325 (56.8%)	122 (21.3%)	72 (12.6%)	74 (12.9%)	38 [36.6-38.7]	283 (49.5%)	15 [3-15]	109 [70-178]	10 [6-16]	70 [55-83]	188 [129-271]	11.7 [7.5-16.3]	2 [1.3-3.4]	12 [10.1-13.6]	20.8%
Influenza CAP (yes)	73 (58.4%)	61 [48.3-69]	55 [37-58.5]	68 (54.4%)	3 [2-6]	125	3 [2-4]	9 (7.2%)	7 (5.6%)	26 (20.8%)	26 (20.8%)	13 (10.4%)	56 (44.8%)	5 (4%)	48 (38.4%)	4 (3.2%)	6 (4.8%)	18 (14.4%)	2 (1.6%)	10 (8%)	76 (60.8%)	31 (24.8%)	17 (13.6%)	19 (15.2%)	38.3 [37.1-39]	64 (51.2%)	15 [3-15]	106 [70-148]	9 (6-15]	72.5 [59-87]	158 [119-218]	8.9 (5.5-14.5]	2 [1.3-3.2]	12.8 [11.3-14]	0.24
Influenza CAP (no)	303 (67.8%)	63 [52,2-74]	48.5 [28.7-68.7]	107 (23.9%)	2 (1-5]	447	3 [2-3]	38 (8.5%)	46 (10.3%)	133 (29.8%)	118 (26.4%)	20 (4.5%)	192 (43%)	23 (5.1%)	149 (33.3%)	18 (4%)	45 (10.1%)	96 (21.5%)	5 (1.1%)	11 (2.5%)	249 (55.7%)	91 (20.4%)	55 (12.3%)	55 (12.3%)	37.7 [36.5-38.6]	219 (49%)	15 [3-15]	110 [71-187]	11 [6-16]	67 [53-81]	204 [136-286]	12.1 [8.2-16.7]	1.9 [1.3-3.5]	11.8 [10-13.5]	18.9%
91	0	53	17	0	3	0	1	0	0	0	0	0	1	0	1	0	0	0	0	0	0	0	0	0		0	15	52		92	286	11.6		14.8	0
129	1	90	44	0	3	0	3	0	0	0	0	0	1	0	1	0	0	0	0	0	0	0	0	0	38	0	15	61			83	15.6		13	1
130	1	59	46	0	2	0	3	0	0	0	0	0	0	0	1	0	0	0	0	0	1	0	0	0	39.3	1	5	75	9	100	176	4.62	1.7	12	0
131	1	53	31	0	2	0	1	1	0	0	0	0	0	0	0	0	0	0	0	0	0	0	1	0	40.5	0	15	89	11	93	400	26.4	1.6	14.8	0
141	0	27	37	1	4	0	3	0	0	0	0	0	0	0	0	0	0	0	0	0	0	0	0	0	40	0	15	51	32	55	113	9.2	1.5	13.5	0
142	1	51	103	0	2	0	4	0	0	1	0	0	0	0	0	0	0	0	0	0	1	0	0	1	38.5	1	3	106	63	25	67	0.6	15	12.6	1
143	1	85	47	0	8	0	3	0	0	0	0	0	1	0	0	0	0	0	0	0	0	0	0	0	38.3	0	15	164		77	371	13.3		9	0
240	1	31	20	1	6	0	3	0	0	0	0	1	0	0	0	0	0	0	0	0	1	0	0	0	40.2	1	15	68		69			1.8		0
241	1	34	16	0	2	0	2	0	0	0	0	1	0	0	1	0	0	0	0	0	0	0	0	0	385	0	15	75		38	410	15.6	2.6	15.6	0
301	1	55.3397	19	0	0	0	2	1	1	0	0	0	1	0	1	0	0	0	0	0	0	0	0	0	40	0	15	165	6	92	81	3.4	1.4	11.8	0
340	0	57.9863	74	1	3	0	4	0	0	0	0	0	1	0	1	0	0	1	0	1	1	1	0	0	38.6	1	3	310	13	44	168	10.3	1.7		1
341	1	79.8301	62	0	2	0	3	0	0	1	0	0	1	0	1	0	0	0	0	0	1	0	0	0	37	0	15	102	16	63	124	10.36	2.4	15.3	1
342	0	38.9507	30	0	16	0	1	0	0	0	0	0	0	0	0	0	1	0	0	0	0	0	0	0		0	15	67		63	187	16	3.8	14.8	1
547	1	84.5315	54	0	4	0	3	0	0	0	0	0	1	0	0	0	0	1	0	0	1	0	0	0		1	3	223		15	136	16.6	2.4	12.5	1
101	1	82	102	0	1	0	5	0	0	0	1	0	1	0	0	0	0	0	0	0	1	0	0	0	39.2	1	11	140	34	48	64	1.8	5.1	10.5	1
336	1	81.5205	53	0	3	0	5	1	0	0	0	0	1	0	0	0	0	1	0	0	0	1	0	0	37.8	1	15	95	5	78	270	2.05	1.5	7.3	0
307	1	64.611	75	0	1	0	3	0	0	1	0	0	1	0	1	0	1	0	0	0	1	0	0	0	37	0	3	109	11	61	128	5.49	1.7	10.5	0
493	1	58.6329	38	0	1	0	2	0	0	0	0	0	0	0	0	0	0	0	0	0	1	0	0	1	36.9	0	15	427	13	76	162	17.13	7.1	19.1	0
500	1	32.8082	37	0	0	0	4	0	0	0	0	0	0	0	0	0	0	0	0	0	1	0	0	0	37.6	1	3	166	12	68	327	6.59	1.6	15	0
528	1	55.7123	39	0	2	0	1	0	0	0	0	0	0	0	0	0	0	0	0	0	1	0	0	0	35.5	0	3	65	21	71	223	13.05	1.2	15.4	0
123	1	82	37	0	7	0	3	0	0	0	1	0	0	0	1	0	0	0	0	0	0	0	0	0	39.4	0	15	123		82	210	6.3	1.6	13	0
128	1	54	42	0	3	0	2	0	0	1	1	0	0	0	0	1	0	0	0	0	0	0	1	0	37.5	1	15			31	30		3.2	6.8	0
552	0	55.1041	25	0	0	0	3	0	0	1	0	0	0	0	1	0	0	0	0	0	0	0	0	0	36	1	10	170	3	62	301	14.51	6.6	10.3	0
92	1	62.0767	35	0	5	0	2	0	0	1	1	0	1	0	0	0	1	0	0	1	1	0	0	0	36.6	1	3	52		71	257	21.2	1.7	10.5	0
93	1	76	59	0	3	0	4	1	0	0	1	0	0	0	0	0	0	0	0	0	0	0	1	0	37.8	1	15	217	4	93	71	8.2	2.8	11.6	0
94	1	67	64	0	2	0	4	0	0	1	0	0	1	0	0	0	0	0	0	0	1	0	0	0	33	1	8	400	8	46	57	0.8	7.4	11.7	0
95	0	67.1589	37	0	6	0	3	0	0	0	0	0	1	0	0	0	0	0	0	0	1	0	0	0	36	1	3	79	7	73	494	30.14	1.9	8.2	1
96	1	68.4192	67	1	7	0	2	0	0	0	0	0	0	0	0	0	0	0	0	0	1	0	0	0	35	1	3	118	48	59	179	5.03	2.1	14.8	0
97	1	48.2575	48	0	0	0	3	0	0	0	0	0	0	0	0	0	0	0	0	0	1	0	0	0	40.7	1	3	190		44	105	26.9	4	15.4	0
98	1	57.0932	66	0	0	0	2	0	0	0	1	0	0	0	0	0	0	0	0	0	1	0	0	0	38.9	1	3	104	13	83	308	15.2		14.7	0
99	1	33	35	0	12	0	3	0	0	0	0	0	1	0	0	0	0	0	0	0	1	0	0	0	38.2	1	14	93	12	70	126	9.8	2.2	15.7	0
119	0	78.9178	49	0	6	0	4	0	0	0	0	0	0	0	1	0	0	0	0	0	1	0	0	0	37.9	1	3	117	6	69	182	35.6	1.3	9.3	0
120	1	47.9726	62	0	0	0	3	0	0	1	0	0	0	0	0	0	0	1	0	0	1	0	0	0	36.6	0	3	98		45	309	8.89	1.8	11.7	0
121	1	48.989	70	1	3	0	3	0	0	1	0	0	0	0	1	1	0	0	0	1	1	0	0	1	38.6	1	3	93	18	49	45	1.02	7.1	13.6	1
122	1	59	82	0	2	0	3	0	0	1	0	0	1	1	0	1	0	1	0	0	1	0	0	1	38.3	1	14	877	12	50	125	1.1	7.3	10.8	0
124	1	55	61	1	3	0	3	0	0	1	1	0	0	0	0	0	0	1	0	0	1	0	0	1	38.5	1	14	250		46	22	2.9	10	11.6	0
125	1	38	43	0	1	0	2	0	0	1	0	0	0	0	0	0	0	0	0	0	1	0	0	0	35.8	0	14	284	6	82	46	6.7	8.9	11.5	0
127	1	75	70	0	1	0	4	0	0	0	1	0	0	0	0	0	0	0	0	0	1	0	0	0		1	3	130		54	150	18.8	10	17.3	1
223	1	74	66	0	1	0	5	0	0	0	0	0	1	0	1	0	0	0	0	0	1	0	0	1	35.1	1	9	595	4	48	76	8.8	5.5	8.9	1
239	1	82.3397	71	1	3	0	3	0	0	1	0	1	1	0	1	0	1	0	0	0	1	0	0	0	39.3	1	3	221				2.4	4.2		0
302	1	68.7178	61	0	4	0	2	0	0	0	0	0	1	0	0	0	0	0	0	0	0	1	0	0	37.4	0	15	56	5		149	4.55	2.1	14.5	0
304	1	45.2822	56	0	0	0	4	0	0	0	0	0	1	0	0	0	0	0	0	0	1	0	0	0		1	3	169		76	300	14.5	15	14.3	0
305	0	65.7616	59	0	1	0	4	0	0	0	0	0	1	0	0	0	0	0	0	0	1	0	0	0	36.1	1	3	160		11	205	24.7	3.5	7	1
306	1	41.1534	24	1	14	0	2	0	1	1	0	0	1	0	0	0	0	0	0	0	1	0	0	0	38.6	1	3	50	9	52	276	6.12	6.1	5.9	0
308	1	43.8603	70	1	3	0	4	0	0	1	0	0	1	0	0	0	0	0	0	0	1	0	0	0	35.5	1	14	380	403	34	140	21	11.9	13	1
309	1	41.1534	24	1	15	0	2	0	1	1	0	0	1	0	0	0	0	0	0	0	1	0	0	0	35.5	1	3	50	9	52	273	6.12	6.1	5.9	0
310	1	79.8137	63	1	0	0	5	0	0	0	0	0	1	0	1	1	0	1	0	0	1	0	0	0	36.5	1	3	320	44		174	17.21	4.4	10.5	1
311	1	61.6986	39	0	16	0	1	0	1	0	0	0	1	0	0	0	0	0	0	0	0	0	0	0	37.1	0	15	73	24	67	427	24.4	1.4	13.3	0
312	1	83.1452	58	0	0	0	3	0	0	1	0	0	0	0	1	0	0	1	0	0	1	0	0	0	36.1	0	3	175	5	64	191	10.01	0.9	9	0
313	1	56.2192	57	0	1	0	4	0	0	1	0	0	1	0	0	0	0	0	0	1	1	0	0	0		1	3	87	10	61	132	2.42	7	11.5	0
314	1	56.2192	57	0	1	0	4	0	0	1	0	0	1	0	0	0	1	0	0	0	1	0	0	0		1	3	87	10	61	132	2.42	7	11.8	0
315	1	61.4658	43	0	1	0	3	0	0	0	0	0	1	1	1	0	0	0	0	0	1	0	1	1	38.2	0	13	837		64	190	2.78	1.7	7.1	0
329	1	48.989	70	1	1	0	3	0	0	1	0	0	1	0	1	1	0	0	0	1	1	0	0	1	38.6	1	3	93	18	49	45	1.02	7.1	13.6	1
330	1	35.9836	49	1	8	0	3	0	0	1	0	0	0	0	0	0	0	0	0	1	1	0	0	0	38.4	1	6	36	12	78	113	22.5	1	8.5	0
331	1	49.3205	32	0	0	0	3	0	0	1	0	0	1	0	0	0	0	0	0	0	0	0	0	0	40	0	13	130				13			0
332	1	75.074	30	0	2	0	3	0	0	0	1	0	1	0	0	0	1	1	0	0	0	1	0	0	37	1	14	70		84	284	8.78		13.4	1
333	1	76.6438	33	0	1	0	3	0	1	1	1	0	1	0	0	0	0	0	0	0	1	0	0	0	34.5	1	3	134	37	46	114	14.43	7.8	11.7	1
334	1	32.3452	65	0	1	0	2	0	0	0	0	0	0	0	0	0	0	0	0	0	1	0	0	0	37.4	1	3	148	7	74	271	25	7.4	15.5	0
335	0	75.4027	68	0	3	0	4	0	1	0	1	0	1	0	0	0	0	0	0	0	1	0	0	0	38.1	1	3	76	3			21	1.5		1
337	1	43.8767	106	0	0	0	4	0	0	1	0	0	0	0	0	0	0	0	0	0	1	0	0	1	34.1	1	3	261		34	93	5.6	11.2	12.7	1
338	1	32.9479	57	0	3	0	4	1	0	0	0	0	1	1	0	0	1	1	0	0	0	1	1	1	36.1	1	14	398	11	74	291	18.27	0.6	10.8	0
339	1	71.1726	54	0	0	0	3	0	0	1	0	0	1	0	1	0	0	1	0	0	1	0	0	0	38.4	0	6	57			476	16.1	4.1	10.5	0
492	1	71.7178	57	0	2	0	5	0	0	0	0	0	0	0	0	0	0	1	0	0	1	0	0	0	39.5	0	11	247	42	60	80	3.5	1.9	12.5	0
494	1	58.4274	48	0	2	0	1	0	1	0	1	0	0	0	0	0	1	0	0	0	1	0	0	0	36.2	0	3	90	3	100	63	9.97	1.2	12.3	0
526	1	67.3945	48	0	15	0	3	0	1	0	0	0	1	0	1	1	0	0	0	0	0	1	0	0	37	1	15	157	26				1.4		0
562	1	76.9288	47	0	1	0	3	0	0	0	0	0	1	0	1	0	0	1	0	0	1	0	0	1		1	3	214	11	30	341	13.9		12.5	0
563	1	75.274	42	0	0	0	5	0	0	1	1	0	0	0	0	0	0	1	0	0	1	0	0	0	39.4	1	3	211	4	54	167	13.4	2.3	13.1	0
556	1	32.8301	39	0	7	1	1	0	0	0	0	0	0	0	0	0	0	0	0	0	1	0	0	0	37.7	1	3	112	34	70	123	2.1	3.2	16.3	0
126	1	53	48	1	7	1	3	0	0	0	0	0	1	0	1	0	0	1	0	0	1	0	0	1	38.7	1	15	149		72	139	12.9	3.2	16	0
316	1	52.1973	65	0	4	1	3	0	0	1	0	0	0	0	0	0	0	0	0	0	1	0	0	0	39.4	1	3	92	4	69	118	8.9	1.1	10.7	0
456	1	75.611	62	0	15	0	2	0	1	0	1	0	0	0	0	0	0	0	0	0	0	1	0	0	38.7	0	6	120	4	53	518	14.7	1.6	12.4	0
196	1	60	46	0	2	0	2	0	0	0	1	0	1	1	0	0	1	0	0	0	0	0	0	1	39.2	0	15	494		73	170	21.4	0.6	8	0
87	0	50	65	0	7	0	4	0	0	0	0	0	0	0	0	0	0	0	0	1	1	0	0	1	38.3	1	15	86	6	76	314	4.1	1.3	13.9	1
88	1	78.2932	66	0	3	0	3	0	0	1	1	0	0	0	0	0	0	0	0	0	1	0	0	0	36.9	1	15	177		70	106	5.1	5.1	11.9	0
166	1	52.4082	68	0	0	0	2	1	1	0	0	0	0	0	0	0	1	0	0	0	1	0	0	0	37.2	1	15	87	14	89	15	0.2	4.4	10.3	1
167	1	66.6219	49	0	2	0	4	0	0	0	0	0	1	0	1	0	0	0	0	0	1	0	1	0	36.4	1	15	266	17	51	84	24.22	3.7	11.5	0
168	1	82.074	37	0	0	0	2	0	0	0	1	0	0	0	1	0	1	0	0	0	0	0	0	0		0	15	137	14	48	162	6.7	2	11.4	0
195	1	75	39	0	7	0	4	0	0	0	1	0	0	0	0	0	1	0	0	0	1	0	0	0		1	15			50			2.7		0
197	0	64	56	1	3	0	3	0	0	0	1	0	0	0	0	0	0	0	0	0	1	0	0	0	38.3	1	15	42	12	80	202	13.7	1.3	13.9	0
243	1	62.811	42	0	3	0	3	0	0	1	1	1	1	0	1	0	0	0	0	0	1	0	0	0	36	1	15	44	11	100	311	13.7	1	15.2	1
295	1	51.1452	48	1	2	0	3	0	0	1	0	0	1	0	0	1	0	0	0	0	1	0	0	0	36.8	1	3	219	3			10.6	2.6		0
297	1	53.0904	57	0	0	0	2	1	0	0	0	0	1	0	0	0	0	0	0	0	0	0	1	0	40.2	1	15	89	12	57	243	8.93	1.7	6.8	0
300	0	23.9699	18	0	2	0	1	0	0	0	1	0	1	0	0	0	0	0	0	0	0	0	0	0	35.3	1	15	49	16	65	346	11.6	1.7	9.1	0
303	1	52.0274	44	0	6	0	3	0	0	1	0	0	1	0	0	0	0	0	0	1	1	0	0	0	36.4	1	3	119	15	36	158	19	9.3	8.9	1
457	1	74.726	39	0	1	0	3	0	1	0	1	0	0	0	0	0	0	0	0	0	0	1	1	0	37	0	15	130	14	61	229	12.1	2.70	12.9	0
458	1	59.9699	57	0	4	0	4	0	0	1	1	0	0	0	0	0	0	1	0	0	1	0	0	0	36.4	1	3	70		53	430	24.3	2.1	11.2	0
459	0	77.7726	56	0	0	0	4	0	0	0	0	0	0	0	1	0	0	0	0	0	1	1	0	0	36.2	1	8	113	7	59	144	9.87	0.9	12.7	1
462	0	60.5671	54	0	4	0	2	0	0	1	1	0	0	1	0	0	0	1	0	0	0	1	0	0	36.2	1	15	287	11	64	160	11.9	0.5	9.7	0
463	1	64.926	56	0	2	0	3	0	0	0	1	0	0	0	0	0	0	0	0	0	1	0	0	0	37.4	1	3	118	24		159	16.39	1	14.4	1
464	0	55.7781	94	0	0	0	3	1	0	0	0	0	0	0	0	0	1	0	0	0	1	1	0	0	38.8	1	3	156	8	60	140	78.9	10.9	11.4	1
514	1	41.4301	80	0	2	0	3	0	0	0	0	0	0	0	0	0	0	0	0	0	1	0	0	0	34.8	1	3	74	18	61	269	42.5	1.7	11.7	1
460	1	60.2986	61	1	7	1	3	0	0	1	0	0	0	0	0	0	0	0	0	0	1	0	1	0	38.9	1	15	138	7			3.7	3.8		1
461	1	67.9836	49	0	6	1	4	0	0	1	1	0	0	0	0	0	0	0	0	0	1	0	0	0	36.33	1	3	142	6	61	237	17.1	2.2	12.8	0
296	1	56.9233	79	0	15	0	3	0	0	1	0	0	1	1	1	0	0	0	0	0	1	0	0	1	38.4	0	3	1221	14	62	186	36.32	1	9.7	0
217	1	66	57	0	4	0	3	0	0	0	1	0	0	0	0	0	0	1	0	0	0	1	0	0		1	15	157		100	367	22.3	1.2	16.4	0
531	1	61.2548	33	0	0	0	3	0	0	1	0	0	1	0	0	0	0	1	0	0	1	1	0	0	34.8	1	14	113	38	68	106	6.75	2.2	11.9	0
238	1	76	42	0	1	1	4	0	0	0	0	1	0	0	1	0	0	1	0	0	1	0	0	0	37	1	15	62		71	195	16	3.6	13.5	0
499	1	88.6932	62	0	1	1	3	0	0	0	0	0	0	0	1	0	0	0	0	0	1	0	0	0	35.5	1	3	142	9	61	147	7.18	2.5	12.1	0
535	1	88.6932	62	0	1	1	2	0	0	0	0	0	1	0	1	0	0	1	0	0	1	1	0	0	35.5	1	15	142	9	61	147	7.18	2.5	12.1	0
209	0	57	51	0	2	0	1	0	0	0	0	0	1	0	0	0	0	0	0	0	1	0	0	0	39	0	15	61	15	79	239	12.7	1.9	15	0
491	0	32.1589	45	0	1	0	3	0	0	1	0	0	0	0	0	0	0	0	0	0	1	0	0	0	36.6	1	3	72	46	71	114	25.8	1	13.9	0
549	0	67.074	80	0	2	0	4	0	0	0	0	0	1	0	1	0	0	0	0	0	1	0	0	1	35.4	1	13	1744	18	69	140	5.5	0.7	6.0	0
545	1	64.0466	70	0	0	1	3	1	0	0	0	0	0	0	0	0	0	0	0	0	1	1	0	0	34.6	1	3	111	3	86	116	0.48	4.4	10.5	0
211	0	41	70	1	2	1	3	0	0	0	0	0	0	0	0	0	0	0	0	1	1	0	0	0	37.2	1	15	66	14	51	257	0.6	3.9	8.9	1
63	0	50	54	0	4	0	3	0	0	0	0	0	0	0	0	0	0	0	0	0	1	0	0	0		1	15	69	18	71	152	10.8	1.6	9.7	0
200	1	24.9918	22	0	0	0	2	0	0	0	0	0	0	0	0	0	0	0	0	0	1	0	0	0	37.3	0	14	63			230	10.58		14	0
201	1	19.6849	45	0	0	0	1	0	0	0	0	0	1	0	0	0	0	0	0	0	1	0	0	1	34.6	0	3	63	8	87	274	7.75	0.7	13.8	0
202	1	40.5808	35	0	3	0	1	0	0	1	0	0	0	0	1	0	0	0	0	0	0	0	1	1	36.5	1	15	428	76	55	202	15.9	4	10.2	0
203	0	76.0767	53	0	0	0	2	0	0	0	0	0	1	0	0	0	0	0	0	0	1	0	0	0	36.9	0	3	43			102	8.8	N	12.7	0
204	0	44.1452	39	1	10	0	2	0	1	0	0	0	0	0	0	0	0	0	0	0	1	0	0	0	37	1	3	49	15	64	198	14.72	1.1	8.2	0
205	0	43	31	1	4	0	4	0	0	0	0	0	0	0	1	0	0	0	0	1	1	0	0	0	39.2	1	15	85	13	71	39	17.6	2.7	10.1	0
206	0	70	84	0	1	0	5	0	0	0	0	0	1	0	1	0	0	1	0	0	1	0	0	0	36	1	15	119	7	28	370	21.6	4.2	12.4	1
208	1	67	50	0	2	0	3	0	0	0	0	0	0	0	0	0	0	0	0	0	1	0	0	0	37	1	15	68	5	37	330	20.2	1.6	12	0
212	1	67	60	0	2	0	5	0	0	0	0	0	0	0	1	0	0	1	0	0	1	0	0	0	36.8	1	9	78		20	400	14.2	1.2	12.5	0
213	0	62	27	0	2	0	2	0	0	0	0	0	0	0	0	0	0	0	0	0	1	0	0	0	38.9	0	14			80		11	0.6	11.9	0
215	1	73	96	0	7	0	5	1	0	0	0	0	0	0	0	0	1	0	0	0	1	0	0	1	38	1	11	200	12	56	239	31.3	12	12.3	1
216	1	58	24	0	3	0	3	0	0	0	0	0	1	0	1	1	0	1	0	0	1	0	0	0	38.5	1	12	246	26	45	47	1.99	2	6.2	1
220	1	78	52	0	5	0	2	0	0	0	0	0	0	0	0	0	0	0	0	0	0	0	0	0	38	0	13	126	31	49	128	20.8		15.4	0
221	1	70	80	0	4	0	4	0	0	0	0	0	1	0	1	0	0	0	0	0	1	0	0	1	38	1	15	126		37	311	11	10	4.3	0
222	1	75	48	0	4	0	2	0	0	0	0	0	1	0	0	0	0	0	0	0	1	0	0	0	37.5	1	15	85	13	79	226	5.1		10.4	0
247	0	11	38	0	2	0	2	0	0	0	0	1	0	0	0	0	0	0	0	0	1	0	0	0	37.2	0	15	59	3	71	332	25.4	1.6	12.3	0
497	1	76.5562	53	0	2	0	2	0	1	1	1	0	0	0	0	0	0	1	0	0	1	1	0	0	35.5	0	15								0
498	0	72.6959	35	0	7	0	1	0	0	0	0	0	0	0	0	0	0	0	0	0	0	1	0	0	37.6	0	15	53			278	13.1	2.2	17.8	0
501	1	50.2795	32	0	0	0	3	0	0	0	0	0	0	1	1	0	0	0	0	0	1	0	0	1	34.9	1	3	600	3	61	244	12.05	1.9	4.5	1
502	1	67.6	49	0	3	0	3	0	0	0	1	0	0	0	1	0	0	1	0	0	1	1	0	0	36.9	0	14	187	10	31	178	8.9	1.1	12.5	0
505	0	52.737	26	0	0	0	1	0	0	0	0	0	0	0	0	0	1	0	0	0	0	0	1	0	39.4	0	15	40		83	229	12.1	1.2	11.8	0
506	1	51.9836	46	0	1	0	3	0	0	1	0	0	0	0	1	0	0	0	0	0	1	0	0	0	33.5	1	3	201	3	50	139	10.94	1.3	10.2	0
510	1	75.589	37	0	2	0	3	0	0	0	0	0	0	0	1	0	0	0	0	0	1	0	0	0	37.1	0	8	128	5	72	231	9.96	1.4	13	1
511	0	34.9863	87	0	0	0	3	0	0	0	0	0	0	0	1	0	0	0	0	1	1	0	0	1	35.5	1	3	136	15	41	452	41	6.1	10	0
512	1	43.9507	27	1	2	0	1	0	0	0	0	0	0	0	0	0	0	0	0	0	0	0	0	0		0	15	60	16	113	246	21.4		13.9	0
520	0	61.2301	51	0	2	0	3	0	0	0	0	0	1	0	0	0	0	1	0	0	1	0	0	0	36.7	1	3	73	5	87	167	10.65	2.5	14.4	0
521	0	72.6959	35	0	7	0	2	0	0	0	0	0	1	0	0	0	0	1	0	0	0	1	0	0	37.6	0	15	53			278	13.19	0.5	17.8	0
543	0	52.0932	58	0	0	0	2	0	0	0	0	0	0	0	0	0	0	0	0	0	1	0	0	0		1	3	85		85	302	12.3	4.5	15	1
568	0	53.0521	53	0	0	0	1	0	0	0	0	0	0	0	0	0	0	0	0	0	1	0	0	0	36.6	0	6	6	6	95	224	9.3	1.2	11.6	0
218	1	56	34	0	2	1	2	0	0	0	0	0	1	0	1	0	0	0	0	0	1	0	0	0		0	15	24		113	207	8.6	1.4	12.8	0
199	1	73.3315	69	1	3	1	4	0	0	0	0	0	0	0	0	0	0	0	0	0	1	0	0	1		1	3	166	17	79		2.75	8.7	15.2	0
207	1	49	100	0	1	1	4	0	0	0	1	0	1	0	0	0	0	0	0	1	1	0	0	1	39	1	15	179	10	58	222	2	6	14.2	1
210	0	14	61	1	3	1	3	0	0	0	0	0	0	0	0	0	0	0	0	1	1	0	0	1	38.3	1	14	150	42	42	123	14	6.4	13	0
214	0	45	82	1	2	1	4	0	0	1	0	0	0	0	0	1	0	0	0	1	1	0	0	1	38.5	1	15	193	19	89	166	13.3	1.4	13.7	1
219	1	19	25	1	10	1	1	1	0	0	0	0	0	0	0	0	0	0	0	0	0	1	0	0	40	0	15	80				20.2			0
495	1	47.6795	37	1	4	1	1	0	0	1	0	0	0	0	0	0	0	0	0	0	0	0	1	0	39.5	0	15	123	14	83	88	8.5	3.3	15	0
496	1	22.1973	53	1	2	1	4	0	0	0	0	0	0	0	0	0	0	0	0	0	1	0	0	0	39	1	3	143	14	69	107	1	3.9	11.6	0
503	1	47.6795	37	1	4	1	2	0	0	1	0	0	0	0	0	0	0	0	0	0	1	0	1	0	39.5	0	14	123		78	88	8.7	2.7	15	0
504	1	60.1726	46	0	1	1	4	0	0	1	1	0	0	0	0	0	0	0	0	0	1	0	0	0	39	1	3	185	6			11	0.9		0
507	0	79.9507	45	1	7	1	3	0	0	0	0	0	0	0	1	0	0	0	0	0	0	1	0	0	37.6	0	10	160	9	65	309	14.67	1	8.6	0
508	1	67.1507	64	0	0	1	4	0	0	1	1	0	0	0	0	0	0	0	0	0	1	0	0	0	36.4	1	3	71	5	58	600	22.23	2	10.8	0
509	1	22.1973	53	0	1	1	4	1	0	0	0	0	0	0	0	0	0	0	0	0	1	0	0	0	38.3	1	3	142	14	69	107	1	3.9	11.6	0
513	1	40.0274	22	0	7	1	1	0	0	0	0	0	0	0	0	0	0	0	0	0	0	0	1	0	37.7	0	15	160	28	71	132	6.41	0.9	12.8	0
522	0	17.7452	41	1	0	1	3	0	0	0	0	0	0	0	0	0	0	0	0	0	1	0	0	0	37.2	1	3	93	21	55	79	3.26	4.7	11.2	0
536	0	62.2932	33	1	6	1	1	0	0	1	1	0	1	0	1	0	0	0	0	0	1	0	0	0	39.5	1	14	48	6	70	135	6.83	3	11.9	0
550	1	87.2438	57	1	7	1	4	0	0	0	0	0	1	0	1	0	0	1	0	0	0	1	1	0	37	0	14	473	5	92	246	9.7	0.7	12.1	0
554	0	60.4603	36	1	7	1	2	0	0	0	0	0	1	0	0	0	0	0	0	0	0	0	0	0		0	15	299		91	82	4.2	1.6	11.3	0
561	1	61.537	57	1	5	1	3	0	0	1	0	0	0	0	0	0	0	0	0	0	1	0	0	1	38.4	1	3	95	17	79	51	1.06	3.1	12.8	1
107	1	81	44	0	2	0	3	0	1	0	0	0	0	0	0	0	0	0	0	0	0	0	0	0	38.2	0	15	114	10	79	233	14	3.7	11.6	0
184	1	46	16	0	1	1	1	0	0	0	0	0	0	0	0	0	0	0	0	0	0	0	1	0	38.3	0	15	84		72	215	7.3		17	0
103	0	70.8411	62	0	2	0	2	0	0	0	1	0	1	0	1	0	0	0	0	0	0	1	0	0	37	0	15	81	8	94	267	12.4	3.8	11.9	0
106	0	66	61	0	1	0	3	0	1	0	1	0	0	0	0	0	0	0	0	0	1	0	0	0	39	1	15	217	14	47	283	30	2.2	11.6	0
111	1	82	52	1	3	0	5	0	0	0	0	0	0	0	0	0	0	0	0	0	1	0	0	0	38.7	0	14	71			305	15.1	5.6	14.2	0
112	0	82	56	1	7	0	4	0	0	0	1	0	1	0	1	0	0	0	0	0	1	0	0	0	39	1	15	110	15	74	266	14.5	1.8	11.5	1
323	0	60.1534	42	1	2	0	3	0	1	1	1	0	1	0	0	0	0	0	0	0	1	1	0	0	37.3	1	3	72	16		625	15.3	2.7	16.8	0
19	1	75	45	0	7	0	3	0	0	0	0	0	1	0	1	0	0	0	0	0	1	0	0	0		1	15	168	6	62	385	13.8	1.9	10	0
102	1	76.4795	41	0	4	0	3	0	0	1	1	0	1	0	0	0	0	0	0	0	0	1	0	0	36.4	0	14	144		67	470	9.1	2.1	12	0
104	1	67.7781	31	1	4	0	2	0	0	1	1	0	1	0	0	0	0	1	0	0	1	1	0	0	37.7	1	3	62		114	316	12.5	1.9	13.5	0
105	1	83.7589	77	0	0	0	4	0	0	1	1	0	1	0	1	1	1	1	0	0	1	0	0	0	35.7	1	3	116	19	75	206	7.4	2.7	11.2	0
108	0	82	66	1	5	0	3	0	0	0	0	0	1	0	1	0	0	1	0	0	1	0	0	0	36.1	1	15	108	12	63	295	26	1	7.7	0
109	0	75	37	0	2	0	3	0	0	0	1	0	1	0	1	0	0	0	0	0	0	1	0	0		0	15	184	6	62	176	15.3	1.5	10	0
110	1	64	50	0	15	0	3	0	0	1	0	0	0	0	0	0	1	0	0	0	1	0	0	0	35.1	1	15	50	9	80	346	12.9	5.8	13.6	0
113	1	81	53	0	5	0	1	0	0	0	1	0	0	0	0	0	0	0	0	0	0	1	0	0	36.7	0	13	61	9	75	491	12.7	1	12.6	0
114	0	26	56	0	5	0	3	1	1	0	0	0	0	0	0	0	0	0	0	0	1	0	0	0	39	1	15	194	37	47	85	3.2	2	10.5	0
115	1	55	44	0	2	0	2	0	0	0	0	0	0	0	0	0	0	0	0	0	1	0	0	0	36.6	0	15	27		103	347	11.1	1.7	12.6	1
116	1	62	49	0	4	0	3	1	0	0	0	0	0	0	0	0	0	0	0	0	1	0	0	0		1	15	59		84	478	8	2	12.4	1
117	1	65	36	0	15	0	3	0	0	0	1	0	0	0	0	0	0	0	0	0	1	0	0	0	38.5	0	15	80	7	79	197	12.1	2	14	0
118	1	33	47	0	2	0	3	0	0	1	0	0	0	0	0	1	0	1	0	0	1	0	0	0		1	15	80		62	173	6.4		13.4	1
318	1	46.5178	35	0	9	0	2	1	1	0	0	0	1	0	0	0	1	0	0	0	1	0	0	0	38.8	0	15	123	15			10.6	1.6		1
319	1	83.4411	69	0	0	0	2	0	0	0	0	0	1	0	1	0	0	1	0	0	0	1	0	0	36.4	1	15	195	13	83	237	9.2	1.9	9.5	0
320	1	57.4411	27	0	0	0	1	0	0	1	1	0	1	0	0	0	0	0	0	0	0	1	0	0	37.4	0	15	80		105	311	17.8	1.7	15.4	0
321	1	57.2027	74	0	2	0	2	0	0	0	0	0	1	0	1	0	0	0	0	0	1	0	0	0	36.1	1	3	154	4	97	209	11	0.9		1
322	1	46.5178	35	0	9	0	1	1	0	0	0	0	1	0	0	0	1	0	0	0	1	0	0	0	38.8	0	15	123	13			10.6	1.6		1
324	0	32.1178	25	0	1	0	1	0	0	0	0	0	0	0	0	0	0	0	0	0	1	0	0	0	38.1	0	15	64		92	276	5.7	1.5	13.7	0
325	0	44.0137	43	1	5	0	3	0	0	0	0	0	1	0	1	0	0	0	0	0	1	0	0	0	37.4	1	3	57	3	66	186	9.4	1	10.1	0
326	0	65.0247	73	1	7	0	4	0	0	0	0	0	1	0	1	0	0	0	0	0	0	0	0	1	40.2	1	13	301	9	55	6	9.36	9.4	10.8	0
327	1	42.7288	26	1	0	0	2	0	1	0	0	0	0	0	0	0	0	0	0	0	1	0	0	0	37.1	0	3	73	5	81	254	16.4	1.7	14.4	0
328	1	66.0438	55	0	0	0	4	0	1	0	1	0	1	0	0	0	0	0	0	0	1	1	0	0	36.7	0	3	56	8	88	282	16.68	0.4	17	0
524	1	67.0658	77	0	15	0	3	1	0	0	1	0	0	0	0	0	0	1	0	0	1	0	1	1	37.8	1	3	479		70	389	8.5		7.9	0
532	0	66.6219	56	0	0	0	3	0	0	0	0	0	1	0	0	0	0	1	0	0	1	0	0	0	37.3	1	3	42	11	67	540	22.6	1.6	8.6	0
540	1	20.3644	58	0	0	0	1	0	0	1	0	0	0	0	0	0	0	0	0	0	1	0	0	0	38.8	0	3	88	2	52	185	10.9		12.3	0
546	1	74.2493	38	0	5	0	2	0	0	0	0	0	1	0	0	0	0	1	0	0	0	1	0	0		1	14	80		22	235	8.6	1	12.7	0
519	0	80.5863	58	1	2	1	3	0	0	0	0	1	0	1	1	0	0	0	0	0	0	0	1	0	35	1	15	379	24	51	129	11.4	3.6	11.4	1
482	0	61.4	44	1	2	0	2	0	0	0	0	0	0	0	1	0	0	0	0	0	0	0	0	0	37.3	0	15	353	6				7.8		0
551	0	79.074	34	0	0	0	2	0	0	0	1	0	1	0	1	0	0	1	1	0	0	1	0	0	38.4	0	15	344		89	187	8	1.1	13.4	0
24	1	58	55	0	3	0	3	0	0	0	0	0	0	0	1	0	0	0	0	0	0	0	0	0	39	0	15	400	12	67	207	21.6	3.5	12.5	0
43	1	58	71	0	2	0	2	0	0	1	0	0	0	0	0	1	0	0	0	0	1	0	0	0	40	0	15	185	123	23	33	1.3	5.1	8.4	1
52	0	78	44	0	2	0	2	0	0	0	0	0	1	0	0	0	0	0	0	0	0	0	1	0	38.1	0	15					25.6	6		0
169	0	35.1315	27	1	1	0	1	0	0	0	0	0	0	0	0	0	0	0	0	0	1	0	0	0	38.3	0	3	89	26		208	8	3.2	14.5	0
170	0	85.326	41	1	0	0	3	0	0	0	0	0	1	0	0	0	0	0	0	0	0	0	1	0	36.3	0	15	206		55	188	12.2	4.1	12.8	1
171	1	83.2192	39	0	7	0	3	0	0	1	0	0	1	0	1	1	0	0	0	0	0	0	0	0	36.7	0	15	189	25		211	14.1	1.7	16.4	0
172	1	82.7342	92	1	3	0	5	0	0	0	0	0	1	0	0	0	0	0	0	0	1	0	0	1	35	1	3	275	13	57	154	0.97	2.4	8.7	1
173	1	69.2411	41	0	10	0	1	0	0	0	1	0	0	0	1	0	0	1	0	0	0	0	0	0	37.4	0	15	82	7	49	334	20.4		13.3	0
174	1	70	27	0	1	0	2	0	0	0	0	0	1	0	1	0	0	0	0	0	0	0	0	0	38.9	0	15	180	8	66	172	17.3	2.6	10.9	0
175	1	55	58	0	1	0	1	0	0	0	1	0	0	0	0	0	0	0	0	0	1	1	0	0	39.1	0	15	87	6	104	213	13.8	1.3	15.8	0
176	0	66	28	0	1	0	2	0	0	1	0	0	0	0	0	0	0	0	0	0	0	0	0	0	38.1	0	15	41	16	82	85	11.7	0.7	11.7	0
177	0	45	16	0	4	0	1	0	0	0	0	0	0	0	0	0	0	0	0	0	0	0	0	0	39	0	15	77	16	72	298	13.7	4.4	12.8	0
178	0	74	69	1	3	0	5	0	0	1	0	0	1	0	1	0	0	0	0	0	1	0	0	1	38.8	1	14	463	7	44	318	37	1.2	6.8	0
180	1	73	42	1	2	0	3	0	0	0	0	0	1	0	1	0	0	0	0	0	0	0	0	0	39.6	0	15	271		59	169	9	4.4	14	0
181	1	67	63	1	15	0	4	0	0	1	0	0	0	0	0	0	0	0	0	0	1	0	0	0	36.5	1	15	124	7	46	252	37.1	2.8	9.4	0
182	1	67	72	0	3	0	4	0	0	0	0	0	1	0	0	0	0	0	0	0	1	0	0	1	39.5	1	15	304	15	57	283	10.5		13	1
185	1	56	35	0	2	0	3	0	0	1	0	0	0	0	0	0	0	1	0	0	1	0	0	0	38.5	1	13	45	45		110	29.3	7.9	11.3	0
186	1	29	19	0	1	0	1	1	0	1	0	0	0	0	0	0	0	0	0	0	0	0	0	0	38.5	0	15	44	44	65	433	16.6	0.4	10.6	0
187	1	56	29	0	2	0	1	0	0	0	0	0	1	0	0	0	0	0	0	0	0	0	0	0	39	0	15	102	30		231	11.7	3.8	11.7	0
188	1	46	55	0	2	0	3	0	0	0	0	0	0	0	0	0	0	0	0	0	1	0	0	0	40	1	15	63		53	122	6	11	12.5	0
189	1	67	52	1	2	0	3	0	0	0	1	0	1	0	0	0	0	1	0	0	1	0	0	1		1	15	101		56	45	4.9	9	12.7	1
190	1	68	105	0	5	0	5	1	1	0	0	0	0	0	0	0	0	0	0	0	1	0	0	1	37.2	1	14	376	8	68	100	2.2	11.5	9.6	1
192	1	87	36	1	5	0	3	0	0	0	0	0	1	0	1	0	0	0	0	0	0	0	0	0	39	0	15	119	12	87	306	19.1	2.9	12.2	0
193	0	84	45	0	3	0	2	0	0	0	1	0	0	0	1	0	0	0	0	0	0	1	0	0		0	15	120	23	36	78	10.4	3.9	10	0
244	0	74.1123	32	0	8	0	1	0	0	0	0	1	1	0	0	0	0	0	0	0	0	0	0	0	36.9	0	15	58	5	89	222	14.3	2.9	12.1	0
245	0	67	21	0	4	0	1	0	0	0	0	1	1	0	1	0	0	0	0	0	0	0	0	0	39.2	0	15	80	13	61	275	26.2	5.9	10.8	0
465	1	62	NC	0	0	0	3	0	0	1	0	0	0	1	0	0	0	0	0	0	0	1	0	1	36.5	0	13	880	10	43		18.7			0
466	1	66.8164	37	0	5	0	3	0	0	0	0	0	0	0	1	1	0	0	0	0	0	0	0	0	36.6	0	15								0
468	1	67.2986	91	0	0	0	4	0	0	1	0	0	0	0	0	0	0	0	0	0	1	0	0	0	38.5	1	3								1
469	0	76.263	34	0	1	0	1	1	1	0	0	0	0	0	0	0	0	0	0	0	0	1	1	0	37.5	0	15	49	7	83	284	12.1	4.3	12.9	0
470	1	87.8795	55	0	0	0	4	0	0	0	0	0	0	0	1	0	0	0	0	0	0	0	0	0	39	1	15	233	3			10.6	3.2		0
471	1	86.4932	35	0	6	0	4	0	0	0	0	0	0	0	1	0	0	0	0	0	1	0	1	0	38.1	1	3	119					4		1
472	1	57.6959	49	0	0	0	2	0	0	0	0	0	0	0	0	0	0	0	0	0	1	0	0	1	38.5	0	3	110	20	81	185	5	2	12	0
473	1	49.7315	84	0	0	0	2	0	0	1	0	0	0	0	0	0	0	0	0	0	1	0	0	0	35.9	1	3	67	8	84	123	11.8	0.8	13.4	0
475	1	49.0658	46	0	2	0	4	0	0	0	0	0	0	0	1	0	0	1	0	1	1	0	0	0	37.1	1	3	187	92	87	114	7.37	1.2	8.5	0
476	1	80.9836	58	0	0	0	4	0	0	0	0	0	0	0	1	0	0	0	0	0	0	1	0	0	35.2	0	14	184	15	74	226	13.87	3.2	12.6	0
477	0	83.2849	24	0	6	0	2	0	1	0	1	0	0	0	0	0	0	1	0	0	0	1	0	0	36.6	0	15	72	6	73	266	16.96	1.3	12.1	1
478	0	35.5918	30	1	2	0	1	0	0	0	0	0	0	1	1	0	0	0	0	0	0	0	0	0	39	1	15	135			246	10.21	1.2	7.5	0
479	1	52.2192	55	0	1	0	4	0	0	1	1	0	0	0	0	0	0	0	0	0	1	1	0	0	38.4	1	8	230	7	40	157	13.85	1.8	10.3	0
481	0	66.9178	60	1	15	0	4	1	1	0	0	0	0	0	0	0	0	0	0	0	1	0	1	0	39	1	3	149	15	97	169	4.6	5.4	10.9	0
483	1	64.2575	30	0	0	0	3	0	0	1	0	0	0	0	0	0	0	0	0	0	0	0	1	0	35.5	0	15	131	3	63	40	7.8	0.9	12.4	0
485	1	61.0164	38	1	7	0	1	0	0	0	1	0	0	0	0	0	1	0	0	0	0	0	1	0	39	0	15	285	9	89	160	26.1	1.5	11.71	0
487	0	79.5671	55	0	1	0	3	1	0	0	0	0	0	0	0	0	0	1	0	0	0	1	1	0		0	15	81	14	42	110	1.3	1.4	7.1	1
490	1	64.0027	39	0	5	0	3	0	0	0	0	0	0	0	0	0	0	0	0	0	0	0	1	0	35.5	0	15	131	9	63	91	5.1	1.5	12.4	0
534	1	62.2219	45	0	0	0	2	0	0	1	0	0	1	1	0	0	0	0	0	0	0	1	0	0	36.5	0	14	880	94	43	308	18.7	1.2	10.7	0
539	0	46.0521	21	0	3	0	2	0	0	1	0	0	1	0	1	0	0	0	0	0	1	0	0	0	37.6	0	3	50	15	86	305	16.3	2.3	12.6	0
179	0	64	46	0	11	1	3	0	0	0	0	0	0	0	1	0	0	0	0	0	1	0	0	0	36.6	1	15	50		27	58	16.6	3.3	11.3	0
183	1	56	37	0	7	1	4	0	0	1	0	0	1	0	0	0	0	0	0	0	1	0	0	1	38.3	0	15	71	46	79	103	5.3	7	14.7	1
191	0	61	36	0	5	1	3	0	0	0	1	0	0	0	0	0	0	0	0	0	1	0	0	0	40.3	1	15	70	8	87	146	13.3	1.6	13.3	0
246	0	67	47	0	3	1	2	0	0	0	0	1	0	0	0	0	0	0	0	0	0	0	0	0		0	15	44		94	203	5.7		16.7	0
467	1	57.5644	55	0	4	1	2	0	0	1	0	0	0	0	0	0	0	0	0	0	1	1	0	0	38.6	1	14	135	5	70	126	9.7	14.5	12.5	0
474	0	65.6082	48	1	1	1	4	0	0	0	0	0	0	0	1	0	0	1	0	0	0	1	0	0	37.2	0	14	157	18	37	150	10.6	0.8	11.9	0
480	1	64.1096	29	1	1	1	2	0	0	1	1	0	0	0	0	0	0	1	0	0	0	1	0	0	39	0	15	75		52	248	10.6	4.8	13.4	0
484	0	87.6603	42	1	3	1	3	0	0	0	1	0	0	0	1	0	0	0	0	0	0	1	0	0		0	15	122	6		206	16.6	2.5	12.7	1
486	1	54.2356	40	1	3	1	3	0	0	1	0	0	0	0	1	0	0	0	0	0	1	1	1	0	39.6	1	3	147	22	62	66	8.04	2.5	10.6	0
488	0	83.1178	52	1	5	1	4	0	0	0	0	0	0	0	1	0	0	0	0	0	0	1	0	0	38.5	0	15	187		99	236	14.4		15	0
489	0	36.4137	23	1	10	1	1	0	0	0	0	0	0	0	0	0	0	0	0	0	0	1	1	0	38.5	0	15	40	7	90	420	14.8	1.4	9	0
541	0	68.0712	48	0	4	1	4	0	0	0	0	0	1	0	1	0	0	0	0	0	1	0	0	0	40	1	3	119	6	61	107	10.8	1.0	10	0
570	1	67.0301	28	1	2	1	4	0	0	0	1	0	0	0	0	0	0	0	0	0	1	0	0	1	29.6	1	3	348			164	2.7	1.4	13.3	1
572	1	71.1973	38	1	3	1	4	0	0	1	0	0	0	0	1	1	0	0	0	0	1	0	0	0	39.1	1	3	152	13	42	172	4.6	6.3	14.1	1
3	1	72.2932	35	0	1	0	3	0	1	1	1	0	1	0	0	0	0	0	0	0	1	0	0	0	39.4	1	3	138	8	87	116	5.13	1.6	12.4	0
10	1	50	31	0	1	0	4	0	0	1	1	0	0	0	0	0	0	0	0	0	1	0	0	0	34.7	1	3	31	9	80	255	13.7	1.3	15.7	1
11	1	62	31	1	5	0	1	0	0	0	0	0	0	0	1	0	0	0	0	0	0	0	1	0	39	0	15	65	3	72	154	11.4	1.9	14.7	0
20	0	48	57	0	15	0	1	1	0	0	0	0	0	1	0	0	0	0	0	0	0	0	0	1	39	0	15	392	30	75	61	4.1	1.4	6.7	0
21	1	65	21	1	5	0	2	0	0	1	1	0	0	0	0	1	0	0	0	0	0	0	0	0	36.3	0	15	45	32	34	30	9.3	1.4	10.7	0
22	0	52	58	1	7	0	3	0	0	0	0	0	1	1	1	0	0	0	0	0	1	0	0	1	39	0	14	418	4	77	160	12.9	0.6	10.4	0
23	0	66	44	0	7	0	2	0	0	0	0	0	0	0	1	0	0	0	0	0	0	1	0	0	38	0	15	164	7	85	175	6	0.7	8.5	0
33	0	68	25	0	1	0	1	0	0	0	1	0	1	0	0	0	0	1	0	0	0	0	0	0	36.1	0	15	82	33	26	259	11.4	1.9	11.4	0
36	1	79	30	0	1	0	3	0	0	0	1	0	0	0	1	0	0	0	0	0	0	1	0	0	37.5	0	14	79		78	376	13.1	1.2	14.9	0
42	0	38	6	0	6	0	1	0	0	0	0	0	0	0	0	0	0	0	0	0	0	0	0	0	37.5	0	15	54		86		16.8	1.2		0
46	1	42	51	1	7	0	3	0	0	1	0	0	0	0	0	0	0	0	0	0	1	0	0	0	35	0	15	89	3		169	14.5	1.5	16.3	0
75	0	53	56	0	6	0	3	1	1	0	0	0	0	0	0	0	1	0	0	0	1	0	0	0	40	1	15	38	3		30	0.2		9.8	0
79	0	77	28	0	4	0	3	0	0	0	0	0	1	0	1	0	0	1	0	0	0	0	0	0	39	0	15	142			138	7.3		11	0
81	1	80	50	1	2	0	3	0	0	0	0	0	1	0	1	0	0	0	0	0	0	0	1	0	39.9	0	15	106		71	122	10.4		14.2	0
225	0	54	46	1	5	0	3	0	0	0	0	1	0	0	0	0	0	0	0	0	1	0	0	0	38.6	1	15	129	4	64	143	8.9	9.7	11.6	0
226	0	25	37	0	2	0	2	0	0	0	0	1	0	0	0	0	0	0	0	0	1	0	0	0	36.6	1	15	45	3	84	217	19.5	1.5	12.5	0
232	0	19	28	0	2	0	1	0	0	0	0	1	0	0	0	0	0	0	0	0	0	0	0	0	37.4	0	15	64	6	78		22	7.9		0
233	0	63	56	1	14	0	3	0	0	0	0	1	1	0	0	0	0	0	0	0	1	0	0	0	39	1	12	102		71	237	8.9	1	13.4	0
237	0	79	29	0	2	0	4	0	1	0	0	1	1	0	1	0	0	0	0	0	1	0	0	1		1	15	108		94	365	19.9		13.8	1
250	0	70.2712	52	1	20	0	2	1	1	0	1	1	1	0	0	0	1	1	0	0	0	1	1	0	36.9	0	15	46		100	198	19.4	1.3	9.5	1
251	1	74.0603	33	0	2	0	2	0	1	0	1	1	1	0	0	0	0	0	0	0	1	1	0	0	39	0	15	87	3				4		0
255	1	61.2904	53	0	1	0	2	0	0	1	1	1	1	0	1	0	1	0	0	0	0	0	0	0	37.1	0	15	259	12	48	54	5.2	2.6	7.3	0
259	0	33.5233	19	1	3	0	1	0	0	0	0	0	1	0	0	0	0	0	1	0	0	0	0	0	39.4	0	15	33		92	255	13.99	1	9.7	0
260	0	65.189	18	1	14	0	3	0	0	0	1	0	1	0	0	0	0	0	0	0	1	1	0	0	36.1	1	3	60	10	94	243	11.34	0.9	13.3	0
261	0	58.6849	33	0	1	0	2	1	0	0	1	0	1	0	0	0	0	1	0	0	1	0	0	0	37.4	0	3	53		26	281	8.12	1.7	10.7	0
262	0	53.4466	37	0	2	0	2	0	0	0	0	0	1	0	0	0	0	0	0	0	0	0	1	0	38	1	15	116		43			3.1		0
267	1	76.0247	44	1	0	0	2	0	0	0	1	0	1	0	1	0	0	1	0	0	0	0	1	0	38.5	0	15	121	10		158	5.28	3.1	9.8	0
273	0	21.3151	24	1	0	0	1	0	0	0	0	0	1	0	0	0	0	1	0	0	0	0	1	0	38	1	15	44	36	58	188	11.87	0.7	6.5	0
292	1	81.5616	3	1	10	0	4	0	1	0	1	0	1	0	1	0	0	1	0	0	1	0	0	0	35.7	1	3	75		81	147	8.33	0.9	11.7	0
555	0	37.0959	6	0	2	0	2	0	0	0	0	0	1	0	1	0	0	0	1	0	1	0	0	0	36.1	0	3	52	4	100	189	9.43	0.6	10.7	0
83	1	56	63	0	5	0	3	0	0	0	1	0	0	0	0	0	0	1	0	0	1	0	0	1	38	0	15								1
89	1	58.6274	48	0	2	0	2	0	0	1	1	0	0	0	0	0	0	0	0	0	1	0	0	0	36.4	1	3	178	4	78	410	9.7	2	9.7	0
90	0	62	60	0	1	0	4	0	0	0	0	0	0	0	0	0	0	1	0	0	1	0	0	0	35	1	15	72	9	88	210	8.9	2.9	11.6	0
100	1	54	29	0	3	0	3	0	0	1	0	0	0	0	0	0	0	0	0	0	1	0	0	0	38.5	1	15	32	39	66	135	13.3	1.9	8.8	0
132	1	67.0685	62	1	4	0	4	0	0	0	0	0	1	0	1	0	0	0	0	0	1	0	0	1	37.2	1	15	455	75	77	30	7	1.4	13.4	0
133	1	59.0384	22	1	4	0	2	0	0	1	0	0	0	0	0	0	0	0	0	0	1	0	0	1	37.5	1	3	290	12	100	50	4.64	1.4	12.6	0
134	1	26	24	0	3	0	3	0	0	0	0	0	0	0	0	0	0	0	0	0	0	0	1	0	40	0	15	126	38	78	56	10.5	0.5	7.9	0
135	1	57	55	0	15	0	3	0	0	1	0	0	0	0	0	0	0	1	0	0	1	0	0	1	36.2	1	15	379			15	20	6.2		0
136	1	45	32	1	3	0	3	0	0	0	0	0	1	0	0	0	0	0	0	0	1	0	0	0	38.3	1	15	156	60	92	100		2.5	10	0
137	1	81	56	1	4	0	3	0	0	0	0	0	0	0	0	0	0	0	0	0	1	0	0	1	38.5	1	15	440	93	100	21	9.9	2.3	8.4	1
138	0	49.8192	57	0	1	0	1	0	0	0	1	0	1	0	1	0	0	0	0	0	1	0	0	0	37.3	1	15	27	4	100	141	10.45	1.3	11.2	0
139	1	63	108	0	10	0	4	0	0	0	0	0	0	0	0	0	0	0	0	0	1	0	0	1	40	1	8	287	29	10	485	1	20	12.1	1
140	1	42	61	1	21	0	2	0	0	1	0	0	0	0	0	0	0	0	0	0	1	0	0	0	37	0	15	294	198	47	36	7.3	4.5	9.2	1
194	1	60	53	1	8	0	3	0	0	1	0	0	0	0	0	0	0	0	0	0	0	0	0	0	39.5	1	15	89	3	58	535	13	1.9	9.8	0
198	1	69	39	0	5	0	3	0	0	1	0	0	0	0	0	0	0	0	0	0	0	0	1	0	38.7	1	14	86	11	71	73	19.2	2.2	13.3	0
224	1	61.1315	21	1	1	0	1	0	0	0	0	0	0	0	0	0	0	0	0	0	0	0	0	0	39	0	15	110	6	72	180	11	1	12.5	0
248	1	27	22	0	4	0	3	0	0	0	0	1	0	0	1	0	0	0	0	0	0	0	0	0	38.9	0	15	61		58		17	2	9	0
249	1	54.4247	26	0	20	0	2	0	1	0	0	0	1	0	0	0	1	0	0	0	1	1	0	0	36.3	0	15	22	22	65	204	9.7	2.2	8.8	0
288	1	77.8548	63	0	0	0	3	0	1	0	0	0	1	0	1	0	0	0	0	0	0	0	0	0	36.5	0	14	81		77	236	14.3	1.7	8.4	1
298	1	29.3178	40	1	0	0	3	0	0	0	0	0	1	0	0	0	0	1	0	0	1	0	0	0	36.9	0	3	249	13	88	87	4.77	0.8	12.8	0
299	1	58.6274	48	0	2	0	3	0	1	1	1	0	1	0	0	0	0	0	0	0	1	0	0	0	36.4	1	3	187	4	78	410	45	2	9.7	0
343	1	59.589	78	1	7	0	3	0	0	0	0	0	0	0	0	0	0	0	0	0	1	0	0	1	36.2	1	3	609	274	97	66	22.03	0.8	9.2	0
344	1	60.1863	41	1	4	0	1	0	0	1	0	0	1	0	0	0	0	0	0	0	0	0	0	1	36.9	0	15	658	199	70	16	12.67	3	10.1	0
345	0	73.2247	50	1	3	0	4	0	0	0	0	0	1	0	0	0	0	0	0	0	0	0	1	0	37	1	15	163	12	64	218	15.71	2.3	9.3	0
346	1	84.3781	39	0	26	0	3	0	1	1	1	0	1	0	0	0	0	0	0	0	0	1	0	0	36.7	0	15	145		100	557	12.3	2.6	13.7	0
347	1	76.3781	52	1	2	0	3	0	0	0	1	0	1	0	0	0	0	0	0	0	0	1	0	0	38.7	0	15	103		75	163	15.9	1.8	14.9	0
348	1	59.2192	40	0	1	0	1	0	1	0	1	0	0	0	0	0	0	0	0	0	1	0	0	0	38.5	0	3	53			167	10	0.7	11.9	0
349	0	69.4904	34	0	0	0	2	0	0	0	1	0	1	0	0	0	0	0	0	0	0	1	0	0	38.5	0	15	152	3			17	1.1		0
516	1	34.6247	22	0	0	0	1	0	0	0	0	0	0	0	1	0	0	0	0	0	0	1	0	0	36.5	0	15					21.5			0
517	1	36.6164	21	0	29	0	0	0	0	1	0	0	0	0	0	0	0	0	0	0	0	0	0	0	39.2	0	15			66		20.1			0
527	1	52.5014	16	0	0	0	1	0	1	1	1	0	1	0	0	0	0	1	0	0	0	0	1	0	37.2	0	15	59	12	65	476	25.3	0.9	14.5	0
565	1	79.6685	64	0	0	0	3	0	0	0	0	0	1	0	1	0	0	0	0	0	1	0	0	0	32	1	3	96	6	91	158	13.7	4.4	1.5	0
4	1	82	30	0	3	0	2	0	0	0	1	0	0	0	1	0	0	0	0	0	0	1	0	0	36.7	0	15	37	4	102	245	14.4	0.6	12.1	0
5	1	63	31	0	7	0	2	0	0	1	1	0	0	0	0	0	0	0	0	0	1	0	0	0	38.5	0	15	68	9	77	231	14.5	1.9	12.5	0
6	0	74	46	0	1	0	3	0	0	0	1	0	0	0	0	0	0	0	0	0	0	1	0	0	40	0	8	52	4	72	30	8.6	0.6	8.8	1
7	1	31	33	0	2	0	1	1	0	1	0	0	1	0	1	0	0	0	0	0	0	1	0	0	40	0	15	109	15	74	235	18.5	2.7	11.6	0
12	1	75	32	0	4	0	1	0	0	0	1	0	0	0	0	0	0	0	0	0	0	1	0	0	38.6	0	15	70		83	172	16	1.2	12	0
13	1	71	42	0	2	0	3	0	0	0	1	0	0	0	1	0	0	0	0	0	0	1	0	0	38.6	0	14	101		91	218	9.2	3.4	14	0
14	1	64	27	0	7	0	1	0	0	0	0	0	0	0	1	0	0	0	0	0	0	0	1	0	38.2	0	15	66	12	76	253	12.1	1	11.4	0
15	1	66	69	0	5	0	4	0	0	0	0	0	1	0	0	0	0	1	0	0	1	0	0	0	36.5	1	15	155	11	42	152	11.5	1.5	11.3	0
16	0	52	26	0	7	0	1	0	0	0	0	0	0	0	0	0	0	0	0	0	0	0	1	0	36	0	15	53	5	100	257	8.1	1.1	13	0
17	0	78	41	1	7	0	4	0	0	1	0	0	1	0	0	0	0	0	0	0	1	0	0	0		1	15	96		60	400	11	1.3	12.1	0
18	1	64	32	0	0	0	3	0	0	1	0	0	0	0	1	1	0	0	0	0	0	0	0	0	39	0	15	126	6	92	207	7.5	4	12.6	0
25	0	57	21	1	9	0	1	0	0	0	0	0	0	0	0	0	0	0	0	0	0	0	0	0	39	0	15	70	4	60	69	6.3	1.1	12.2	0
26	1	86	111	0	1	0	2	0	0	0	0	0	1	0	1	0	0	0	0	0	0	1	0	0	36.3	0	13					20	2.2		1
27	1	50	36	1	6	0	3	0	0	1	0	0	1	0	1	0	0	1	0	0	1	0	0	0	35.9	1	15	116	18	89	167	14.4	2.8	15	0
29	0	51	18	1	2	0	1	0	0	0	1	0	0	0	0	0	0	0	0	0	0	0	0	0	36	0	15					5.6			0
30	0	74	81	0	4	0	2	0	0	0	0	0	1	0	1	0	0	0	0	0	1	0	0	0	40	1	10	161		75	257	12.1	3.1	14.9	0
31	1	65	58	1	4	0	0	0	0	0	0	0	0	0	0	0	0	0	1	0	1	0	0	0	36	0	15	91		88	202	10.8	1.2	13.6	0
32	0	64	52	0	1	0	2	0	0	0	0	0	1	1	1	0	0	0	0	0	0	0	0	1	35.4	1	15	431	21	60	207	16.3	4	16.3	0
34	1	50	60	0	2	0	0	0	0	1	0	0	0	0	0	0	1	0	0	0	1	0	0	0	38.3	1	14	297		61	335	4.2	6.9	9.6	0
37	1	54	34	0	2	0	3	0	0	1	1	0	0	0	0	0	0	0	0	0	0	0	0	0	37.5	0	15	200	27	56	180	10.2	4	13.8	0
38	0	78	39	0	1	0	4	0	0	0	0	0	1	0	1	0	0	0	0	0	1	0	0	0	38.8	1	15	75		64	220	18	2	13.2	1
39	0	78	69	0	1	0	4	0	0	1	0	0	0	0	1	0	0	0	0	0	1	0	0	0	35.9	0	15	90	9	61	101	7.9	2.1	8	0
41	1	64	58	0	1	0	3	0	0	1	1	0	0	0	0	0	0	0	0	0	1	0	0	0	36	1	13	229		55	124	6.2	1.2	18	0
44	1	89	89	1	2	0	3	0	0	0	0	0	1	0	1	0	0	0	0	0	0	0	0	0	38	0	15	274			138	12.1	3.7	11.2	1
48	0	70	28	1	3	0	1	0	0	0	0	0	1	0	1	0	0	0	0	0	0	1	0	0	37.2	0	15	32		80	356	6.1	1	13.5	0
50	0	41	29	0	7	0	2	0	0	0	0	0	0	0	0	0	0	0	0	0	1	0	0	0	36	1	15	82	7	100	102	3	1.5	15	0
58	0	58	37	1	4	0	3	0	0	0	0	0	1	0	0	0	0	0	0	0	1	0	0	0	39.3	1	15	77	3	73	126	3.6	0.9	9.6	0
60	1	67	40	1	2	0	2	0	0	0	0	0	1	0	1	0	0	0	0	0	0	0	0	0	39	0	15	207					1.2		0
68	0	57	95	0	1	0	4	0	0	0	0	0	1	0	0	0	0	0	0	0	1	0	0	0	37	1	3	102	7	57	183	15.2	5	12.9	1
70	1	63	31	0	4	0	1	0	0	1	0	0	0	0	0	0	0	0	0	0	0	0	0	0	35.1	0	14	216	8	42	250	13.7	4	16.4	0
73	0	87	53	0	1	0	4	0	0	0	1	0	0	0	0	0	0	0	0	0	1	0	0	0	33.6	1	3	84	7	89	126	9.8	4	12.1	1
76	1	60	34	0	5	0	3	0	0	0	0	0	0	0	0	0	0	0	0	0	1	0	0	0	39.5	1	15	76	4	92	139	2.9	2.1	13.9	0
78	1	51	41	0	1	0	3	0	0	0	0	0	1	0	0	0	0	0	0	0	0	0	0	0	38	0	15	584	32	49	289	19.2	1.5	16	0
82	1	52	43	0	5	0	3	1	0	0	0	0	0	0	0	0	1	1	0	0	0	1	0	0		0	15					9			1
84	0	56	55	0	2	0	2	0	0	0	0	0	0	1	0	0	0	0	0	0	0	1	0	1	38.5	1	15	482	4	63	380	9.7	1.8	8.3	0
85	1	56	55	0	1	0	3	0	0	0	1	0	0	0	0	0	0	0	0	0	1	0	0	0	37.2	1	15	150	4	100	203	22	1.4	16	1
86	1	34	58	0	10	0	4	0	0	1	1	0	1	0	0	0	0	0	0	0	1	0	0	1	38	1	15	1980	17	58	309	17	2.2	3.7	0
144	1	83.2466	35	0	2	0	2	0	0	0	0	0	1	0	0	0	0	0	0	0	1	0	1	0	38.5	0	15	150	18	25	165	12.16		15	1
145	0	56.3973	45	0	0	0	2	0	0	0	1	0	1	0	1	0	1	0	0	0	1	0	0	0	38.4	0	4	57			352	11.9	8.3	16.4	0
146	1	77.5479	65	1	4	0	3	0	0	0	0	0	1	0	1	0	0	0	0	0	1	0	0	0	37.2	1	3	223		18	230	14.5	5.3	11.5	1
147	1	50.7726	79	0	1	0	2	0	0	1	0	0	1	0	0	0	0	0	0	0	1	0	0	0	37	1	3	144	3	80	139	3.5	8.2	14.9	0
148	1	79.6411	52	0	3	0	2	0	0	0	1	0	1	0	0	0	1	0	0	0	0	0	0	0	37	0	15	73	15			16	1.6	21.1	0
149	1	60.2384	68	0	0	0	2	0	0	1	0	0	0	0	0	0	0	0	0	0	1	0	0	0	34.5	1	3	83		71	187	7.8	1.2	14.9	0
150	1	66.2685	32	1	5	0	4	0	0	1	0	0	0	0	0	0	0	0	0	0	0	0	1	0	37.4	0	14	183		23	276	16.7	2.2	8.1	0
151	1	76.5397	22	1	6	0	3	0	0	0	1	0	1	0	0	0	0	0	0	0	1	1	0	0	38.7	0	15	61	11	100	202	15		12.7	1
152	0	88.6247	39	0	17	0	5	0	0	0	0	0	0	0	1	0	0	1	0	0	0	1	1	0	39	0	12	161		58	159	14.7	1.5	11.8	1
153	1	67.0493	36	0	5	0	3	0	0	1	0	0	1	0	0	0	0	0	0	0	1	0	0	0	36.9	1	15	261		77	268	22.4	1.4	11	0
154	0	70.1945	39	0	0	0	3	0	0	0	0	0	1	0	1	0	0	0	0	0	1	0	0	0	35.9	0	3	537	5	57	131	10.9	1.3	6.6	0
155	1	83.9507	80	1	3	0	2	0	0	0	0	0	0	0	0	0	0	0	0	0	0	1	0	0	39.8	1	15	289	16	49	204	9.1	1.9	10.9	0
156	0	24.1288	35	0	1	0	1	1	0	1	0	0	0	0	1	0	1	0	0	0	1	0	0	0	35	1	3	17	3	84	432	21.29	1.5	7.8	1
157	1	63.589	39	0	6	0	4	0	0	0	1	0	1	0	0	0	1	0	0	0	1	0	0	0	37.8	1	3	130	36	61	90	12.31	2.4	11.7	0
158	0	57.5425	24	0	1	0	1	0	0	0	1	0	1	0	1	0	0	0	0	0	1	0	0	0	35.6	1	12	83	41	51	113	6.9	1	14.2	0
159	0	69.0082	18	1	4	0	1	1	1	0	0	0	0	0	1	0	0	0	0	0	0	1	0	0	37.7	0	15	102	12	65	215	10.06	1.3	7.3	0
160	1	51.9973	18	0	0	0	1	0	0	1	0	0	1	0	1	0	0	0	0	0	1	0	0	0	36.9	1	3	89	6	100	290	14	3.5	13.5	0
161	1	46.4849	32	0	7	0	2	0	0	0	0	0	0	0	0	0	0	1	0	0	1	0	0	0	38.4	1	3	76	16	69	103	9.1	2.2	11	0
162	1	52.5425	63	0	4	0	2	0	0	0	0	0	1	0	1	0	0	0	0	0	1	0	0	0	40.5	1	15	214	6	65	383	24.1	2.2	10.3	0
163	1	83.1205	83	0	0	0	3	0	0	1	1	0	1	0	1	0	1	0	0	0	1	1	0	0	38.5	1	3	120	4	67	245	38.1	3.8	11.7	0
164	1	54.8219	22	0	1	0	1	0	0	1	0	0	0	0	0	0	0	0	0	0	1	0	0	0	38.4	0	15	65	29	40	30	3.2	4	13.2	0
165	1	62.3808	33	1	8	0	3	0	0	0	0	0	1	1	1	0	0	1	0	0	1	0	0	1	34.6	1	15	717	5	15	294	13	2.2	10.3	0
242	0	89.9233	47	0	7	0	3	0	0	1	1	1	1	0	1	0	0	1	0	0	0	1	0	0	39	0	15	116	13	79	316	13	1.8	11	1
350	1	57.9562	31	0	0	0	3	0	0	1	1	0	0	0	0	0	0	0	0	0	0	0	0	0	35.6	1	13	284		70	298	13	1.5	9.37	0
351	1	69.8849	50	0	2	0	4	1	0	1	1	0	1	0	1	0	1	0	0	0	0	0	0	0	37.5	1	15	110	5	65	238	1.3	2	9.3	0
352	0	48.6329	46	0	1	0	3	0	0	1	0	0	1	0	1	0	0	0	0	0	1	0	0	1	35.2	1	14	320	42	47	139	2	5.3	10.7	0
353	0	65.6274	53	1	7	0	2	0	0	0	0	0	1	0	0	1	0	1	0	0	0	1	1	0	36.9	0	15	1886		9	126	20	4.8		0
354	1	55.2521	23	0	2	0	1	0	0	1	0	0	1	0	1	0	0	0	0	0	0	0	0	0	36.5	0	15	152	10	65	185	13.6	1.9	12.3	0
355	1	58.6411	25	1	3	0	2	1	1	0	0	0	1	0	0	0	0	0	0	0	0	0	0	0	38.5	0	15								0
356	1	34.3479	28	0	14	0	2	0	0	0	0	0	1	0	0	0	0	1	0	0	0	1	0	0	38.7	1	15	20	11	50	391	2.42	3.4	16.1	0
357	1	85.0575	33	0	1	0	2	0	0	0	0	0	1	0	1	0	0	0	0	0	0	0	0	0	38.1	0	15								0
358	0	46.2219	46	1	5	0	2	1	1	0	1	0	1	0	0	0	0	1	0	0	0	0	0	0	38.4	1	15	134							0
359	1	65.3534	30	0	7	0	4	0	0	0	0	0	1	0	1	0	0	1	0	0	1	0	0	0	39	1	14	177	12	58	328	16.58	1.6	9.8	1
360	1	72.926	68	1	7	0	4	0	0	0	1	0	1	0	1	0	0	0	0	0	1	0	0	0	36.5	1	13	88	11	43	375	14.32	1	11.6	1
361	1	74.5452	24	0	3	0	1	0	0	0	0	0	1	0	0	0	0	1	0	0	0	0	0	0	39.5	0	15								0
362	0	46.7507	26	1	2	0	1	0	0	0	0	0	1	0	0	0	0	0	0	0	0	0	1	0	37.5	0	15	60	5	71	131	13.74	1.3	8.3	0
363	0	55.9562	19	0	2	0	2	0	1	1	1	0	1	0	0	0	0	0	0	0	0	1	0	0	38.1	0	14	51					0.5		0
364	1	62.7397	54	0	2	0	3	0	0	1	0	0	1	0	0	0	1	0	0	0	1	0	0	0	36.5	1	3	71	10						0
365	0	77.4849	49	0	1	0	4	0	0	0	1	0	1	0	1	0	0	1	0	0	0	0	0	0	38.3	1	14	272		17		13.2	7.2		0
366	1	71.5699	42	1	0	0	3	0	0	0	0	0	1	0	1	0	0	1	0	0	0	1	0	0	38.5	1	15	103	33	47	158	7.5	2.5	11.3	0
367	1	79.8438	62	0	2	0	5	1	0	0	1	0	1	0	1	0	0	0	0	0	1	0	0	1	36.5	1	3	161	6	69	299	15.3	1.1	11.3	0
368	1	71.1288	28	0	35	0	2	0	0	0	0	0	1	0	0	0	0	0	0	0	0	0	1	0	36.8	0	15	32	3	52	505	9.7	2	9.7	0
369	1	66.8301	44	0	0	0	3	0	0	1	1	0	1	0	0	0	0	1	0	0	1	0	0	0	37.9	1	15	99	22	71	195	10	3.1	12.9	0
370	1	76.0658	58	0	23	0	4	0	0	0	1	0	1	1	0	0	1	1	0	0	1	1	0	1	38.6	1	3	471	13	74	141	6.1	0.9	11.1	0
371	0	33.5452	18	0	1	0	1	0	0	0	0	0	1	0	0	0	0	0	0	0	0	0	0	0	38.6	0	15	96		71	245	11.7	4.7	12.5	0
372	1	52.2	31	0	2	0	3	0	1	0	1	0	1	0	0	0	0	0	0	0	1	0	0	0	35.1	1	3	117	5	94	179	19	6.7	14	0
373	0	81.789	24	1	1	0	2	0	0	0	0	0	1	0	0	0	0	1	0	0	1	0	1	0	38	1	15	62	3	62	438	16		13.9	1
374	0	79.211	39	1	9	0	2	1	1	0	0	0	1	0	1	0	0	0	0	0	0	1	0	0	40	0	15	289				17	0.6		0
375	0	76.5918	41	1	5	0	2	0	0	0	0	0	1	0	1	0	0	1	0	0	0	1	0	0	35.9	0	15	169	13			11	2.1		0
376	1	70.0658	44	0	0	0	3	0	0	0	0	0	1	0	0	0	0	0	0	0	1	1	1	0	35.4	0	15	144	5			8	2.4		1
377	1	73.4712	38	0	3	0	2	0	0	0	0	0	1	0	1	0	0	0	0	0	0	0	0	0	36.6	0	15	403	8	75	223	7.7	2	11.5	0
378	1	70.9589	54	0	2	0	4	0	0	1	0	0	1	0	0	0	0	0	0	0	1	0	0	0	37.9	1	3	114		77	178	3.65	2.7	13.2	0
379	1	54.7836	26	0	0	0	1	0	1	1	0	0	1	0	0	0	1	0	0	0	0	1	1	0	38.3	0	15	57	11						0
380	1	84.8493	62	0	0	0	2	1	0	0	1	0	1	0	1	0	1	1	0	0	0	0	0	1	36.6	0	15	402				31	0.7		0
381	1	67.9808	31	0	5	0	2	0	0	0	0	0	1	0	0	0	0	0	0	0	0	1	0	0	38.7	0	15	55	11	91	308	9.9	1.1	12.5	0
382	0	28.4575	9	0	1	0	1	0	0	0	0	0	1	0	0	0	1	0	0	0	0	0	0	0	39.5	1	15	140	11	57	36	0.22	1.2	3.9	0
383	1	73.4137	110	0	0	0	4	0	0	0	0	0	0	0	1	0	1	0	0	0	1	0	0	0		1	3	127	27				7.9		1
384	1	52.0466	23	0	3	0	2	0	0	0	0	0	0	0	1	0	0	1	0	0	0	0	1	0	37.9	0	15	246	8				2.9		0
385	1	55.9644	38	0	0	0	2	0	0	0	0	0	0	1	1	0	0	1	0	0	0	1	0	1	35.2	0	15	1982			265	7.65	3.4	12	0
386	1	17.8274	18	0	1	0	1	0	0	0	0	0	0	0	0	0	0	0	0	0	0	0	0	0	40.2	0	15	101	31	64	109	4.38	1.1	13.4	0
387	1	73.2795	31	1	1	0	4	0	0	0	1	0	0	0	0	0	0	1	0	0	0	1	0	0	39	0	14	153	3		216	16	1.6	14.5	0
388	1	90.6658	66	0	6	0	5	0	0	0	1	0	0	0	0	0	0	1	0	0	1	0	0	0	35.9	1	3	282	17	40	156	7.8	1.1	10.1	1
389	0	59.7123	77	1	10	0	4	0	0	0	0	0	0	0	0	0	1	0	0	0	1	1	0	1	37.4	1	3	153	115	47	153	31.96	6.3	9.2	1
390	1	37.6877	41	0	0	0	2	0	0	0	0	0	0	0	0	0	0	1	0	0	1	0	0	0	35.9	1	3	64			221	11.1	1.3	11.8	0
391	0	30.7808	8	0	3	0	1	0	0	0	0	0	0	0	0	0	0	0	1	0	0	0	0	0	36.1	0	14	41	4	97	318	12	2.8	9.1	0
392	1	85.6986	51	0	1	0	3	0	0	1	1	0	0	0	0	0	0	0	0	0	1	0	0	0	36.5	1	3	65	4	47	175	5.9	0.8	9.3	1
393	0	78.6904	42	0	3	0	2	0	0	0	1	0	0	0	0	0	0	0	0	0	0	1	0	0		0	15	79	3	97	239	3.2	0.7	9	1
394	0	88.7918	38	0	2	0	3	0	0	0	0	0	0	0	1	0	0	1	0	0	0	1	0	0	36.5	0	15	352		17	322	18.6	1.1	8.2	0
395	0	71.3014	69	0	0	0	2	0	0	0	0	0	0	0	1	0	0	0	0	0	1	0	0	0	38.6	0	13	86	9	77	300	17	3.8	15	1
396	1	58.4986	19	0	7	0	1	0	0	0	0	0	0	0	0	0	0	0	0	0	0	0	1	0	37.9	0	15	115	6		151	2.14	3.3	16	0
397	1	49.5973	22	1	3	0	1	0	0	1	0	0	0	0	0	1	0	0	0	0	0	0	0	0	38.6	0	15	55	119	34	28	7.26	2.8	10.5	0
398	1	43.4	16	0	2	0	2	0	0	1	0	0	0	0	0	0	0	0	0	0	0	1	0	0	39.3	0	13	57	107	80	83	9.8	2.1	10.5	0
399	1	#REF!	60	0	2	0	2	0	0	0	0	0	0	0	0	0	1	0	0	0	1	0	0	0	40	1	15	33	127	35	230	28.6	8.6	9.1	1
400	0	67.6521	26	1	9	0	3	0	0	0	0	0	0	0	1	0	0	0	0	0	0	1	0	0	38.1	0	15	180		88	105	41.6	0.7	13	0
401	0	57.7068	13	0	2	0	1	0	1	0	1	0	0	0	0	0	1	0	0	0	0	0	0	0	38.3	0	15	57	5	100	222	15.23	1.4	15.9	0
402	1	74.0712	40	0	5	0	2	0	0	1	1	0	0	0	0	1	0	1	0	0	1	1	0	0	37	1	8	72	13	69	174	18.15	1	12	0
403	1	57.9562	31	0	0	0	3	0	0	1	1	0	0	0	0	0	0	0	0	0	0	0	0	0	35.6	1	14	284	11	62	71	13.6	2.4	10.3	0
404	1	74.7753	52	0	12	0	3	1	1	0	1	0	0	0	1	0	0	0	0	0	0	0	1	0	35.7	0	15	272	14	50	488	24.46	1.9	9.6	0
405	1	55.4685	52	0	1	0	3	0	0	0	0	0	0	0	0	0	0	0	0	0	0	1	0	0	36.1	1	15	198	19	46	246	43.2	6	13.8	0
406	1	64.5945	39	0	1	0	2	0	0	1	0	0	0	0	0	0	0	0	0	0	0	0	0	0	28.5	0	12	113			109	12.6	2.4	11	0
407	1	65.3726	59	0	1	0	4	0	1	0	0	0	0	0	1	0	0	1	0	0	1	0	0	0	38.8	0	3	352	5	70	134	19.43	0.8	11.3	0
408	0	26.1671	16	0	10	0	0	0	0	0	0	0	0	0	0	0	0	0	0	0	0	0	0	0	36.6	0	15	68			510	25	2.6	9.4	0
409	1	71.789	63	0	2	0	4	0	0	1	0	0	0	0	0	0	0	0	0	0	1	0	0	0	37.7	1	3	97	13	76	206	13	0.7	12	0
410	1	69.2164	21	0	0	0	1	0	0	1	0	0	0	0	0	0	0	0	0	0	0	0	1	0	38.1	0	15	146				N	7.5	N	0
411	1	66.3178	30	1	11	0	2	1	0	1	1	0	0	0	0	0	0	0	0	0	1	1	0	0	37	0	15	81		87	320	10.6	0.9	14.6	0
412	1	49.9014	48	0	0	0	2	0	0	1	0	0	0	0	0	0	0	0	0	0	1	0	0	0	37.6	0	3	120	5	86	106	13.1	1.1	13	0
413	1	58.3479	33	0	5	0	2	0	0	1	0	0	0	0	1	0	0	1	0	0	0	0	0	0	38.5	0	14	231		69	408	17.25	0.9	10.3	0
414	0	62.3699	62	0	0	0	4	0	0	0	0	0	0	0	1	0	0	0	0	0	1	0	0	0	37.1	1	3	69	8	64	176	27.34	2.9	13.5	0
415	0	55.2986	18	0	3	0	1	1	0	0	0	0	0	0	0	0	1	0	0	0	0	0	0	0	38.3	0	15				67	0.4		13.5	0
416	1	66.8247	18	0	0	0	4	0	0	1	0	0	0	0	0	0	0	1	0	0	1	0	1	0	36.3	1	11	125	9	43	148	9.13	2.6	12.9	0
417	1	63.0164	46	0	0	0	2	0	0	1	1	0	0	0	0	0	0	1	0	0	1	0	0	0	36.60	1	15	106		74	266	13.6	0.7	14.9	0
418	1	76.4932	31	0	2	0	3	0	0	0	0	0	0	0	0	0	0	1	0	0	0	0	1	0	38	0	15	115	38			12.9			0
419	1	84.0301	63	0	2	0	3	0	0	0	0	0	0	0	0	0	0	1	0	0	1	0	1	0	38.5	0	15	145	7	58	99	7.64	1.4	12.7	0
420	0	80.9151	46	1	3	0	2	0	0	0	0	0	0	1	1	0	0	0	0	0	0	0	0	0	38.7	0	15	346		65	279	13.6	0.6	8.9	0
421	1	55.8082	29	0	1	0	2	0	0	1	0	0	0	0	0	0	0	0	0	0	0	0	0	0	37.6	0	15	64	9	69	230	3.17	4.1	9.1	0
422	1	64.126	63	0	0	0	3	0	0	1	0	0	0	0	0	0	0	0	0	0	1	0	0	0	35.5	1	3	95		100	175	7.54	1.2	13.6	0
423	0	34.8877	68	0	0	0	2	0	0	0	0	0	0	0	0	0	0	0	0	0	0	1	0	0	36.4	0	15	60		45	71	36.8	1.3	8.2	1
424	1	78.0082	41	0	12	0	3	0	0	0	0	0	0	0	0	0	0	1	0	0	1	0	0	0	38.5	1	3	169	13	31	495		1.3	10.1	0
425	1	73.1644	40	0	2	0	3	0	0	0	1	0	0	0	0	0	1	0	0	0	0	1	1	0		0	15	151	5	84	223	7.3	0.9	9.8	0
426	0	73.9178	63	0	7	0	3	1	0	0	0	0	0	1	1	0	0	0	0	0	0	0	1	1	36.1	1	15	256	13	57	311	33.48	0.9	9.7	0
427	1	51.8658	20	1	9	0	1	0	0	1	0	0	0	0	0	0	0	0	0	0	1	0	0	0	36.6	0	15	64	10	84	150	10.96	0.7	13.3	0
428	0	82.4493	28	1	11	0	2	0	0	0	0	0	0	0	1	0	0	1	0	0	0	0	0	0	36.1	0	15	109		73	302	11.7	6.6	14.6	0
429	1	59.4767	27	1	5	0	3	0	0	1	0	0	0	0	0	0	0	0	0	0	1	0	0	0	37.9	1	3	49		64	363	14.6	3.1	10.6	0
430	0	32.6301	18	0	0	0	2	0	0	0	0	0	0	0	0	0	0	0	0	0	0	0	1	0	38.5	0	15	75	3			18.5	3		0
431	0	80.9808	49	0	2	0	2	0	0	0	0	0	0	1	0	0	0	1	0	0	0	0	0	0	35.8	0	15	157	12	22	69	13.1	3.2	11.5	0
432	1	66.8932	29	0	1	0	2	0	0	1	0	0	0	0	0	0	0	0	0	0	0	0	0	0	39.5	0	15	61		95	260	22.16		12.2	0
433	0	78.9342	46	1	0	0	3	0	0	0	1	0	0	0	0	0	0	1	0	0	0	0	0	0	38.3	1	15	119	29		200	14	2.3	10	0
434	1	62.4849	38	1	6	0	2	0	0	0	0	0	0	0	1	0	0	0	0	0	0	1	0	0	36.9	0	15	90		95	304	11.8	0.7	12.2	0
435	0	75.0247	29	1	0	0	2	0	0	1	0	0	0	0	0	0	0	0	0	0	0	0	0	0	36.9	0	15	69			290	12.5	1.54	10.6	0
436	0	43.7205	17	1	3	0	1	0	0	0	1	0	0	0	1	0	0	0	0	0	0	0	0	0	38	0	15	97	13	82	181	9.1	2.1	16.8	0
437	0	72.3753	39	0	1	0	3	0	0	0	0	0	0	0	1	0	0	0	0	0	0	0	0	0	40	0	13	200	6	52	161	18.8	1.6	10.4	0
438	1	68.5863	40	1	5	0	3	0	0	0	1	0	0	0	1	0	0	1	0	0	0	1	0	0	38.9	0	15	314	15	31	129	19.9	0.9	8.5	0
439	1	71.011	92	0	0	0	3	0	0	1	0	0	0	0	0	0	0	1	0	0	1	0	0	0	35.8	1	3	110	7	61	231	16.57	3.6	12.9	0
440	0	72.6	47	1	4	0	3	0	0	0	0	0	0	1	1	0	0	0	0	0	0	0	0	1	36.8	0	15	577		61	180	9.6	2.1	10.1	0
441	0	40.9397	26	0	2	0	1	1	0	0	0	0	0	0	0	0	1	0	0	0	0	0	0	0	38.6	0	14	350	27	66	276	23	2.5	12.4	0
442	1	77.7479	31	0	1	0	1	0	0	0	1	0	0	0	0	0	0	0	0	0	0	1	0	0	37.2	0	15	42	3	84	370	11.88	0.6	8.7	0
443	0	64.2795	27	1	3	0	1	0	0	0	0	0	0	0	1	0	0	0	0	0	0	1	0	0	38.2	0	15	173				15.6	0.5		0
444	0	61.6877	46	0	6	0	2	0	0	0	0	0	0	0	1	0	0	0	0	0	0	0	1	0	38.9	0	15	257	10	90	306	16.4	0.5	8.8	0
445	0	85.0658	94	0	14	0	3	0	0	0	1	0	0	0	0	0	0	1	0	0	0	1	0	0	38.5	0	14	77		71	342	16.5	2.5	10.9	1
446	1	57.2493	20	0	0	0	2	0	0	1	1	0	0	0	0	0	0	0	0	0	0	0	0	0	39.7	0	13	48	14	93	133	15.1	0.4	12.2	0
447	1	92.3041	31	0	0	0	3	0	0	0	1	0	0	0	0	0	0	1	0	0	0	0	1	0	40.3	0	15	82		35	175	16	2.1	10.4	0
448	0	50.5068	29	1	3	0	1	0	0	0	0	0	0	0	0	0	0	0	0	0	0	0	1	0	39.9	0	15	57		73	571	11.2	1.4	6.2	0
449	1	74.8301	68	0	0	0	4	0	0	0	0	0	0	0	1	0	0	0	0	0	1	0	0	0	36.7	1	3	111	20	60	288	10.38	3.5	14.2	0
450	1	58.9534	22	0	1	0	2	0	0	0	0	0	0	0	1	0	0	0	0	0	1	0	0	0	38.5	0	3	54			265	11.2	2.4	14.2	0
451	0	72.0795	53	0	4	0	5	0	0	0	0	0	0	0	1	0	0	1	0	0	1	0	0	0	38.3	1	3	85	14	80	91	23.7	0.7	9.4	0
454	1	70.8438	62	0	1	0	3	0	0	0	0	0	0	1	0	0	1	0	0	0	0	0	0	1	40	0	15	852	9	85	391	17.1	2.6	13.6	0
455	1	57	26	1	3	0	1	0	0	1	0	0	0	0	0	0	0	0	0	0	0	0	0	0	37.2	0	14	79	28	90	269	12.5	1.6	13.9	0
523	1	36.7507	26	0	0	0	2	0	0	0	0	1	0	0	0	0	0	0	0	0	1	0	1	0	38	0	3	99	81	53	36	7.52	1	4.5	0
530	1	45.5671	44	0	0	0	0	0	0	1	0	0	1	0	0	0	0	0	0	0	1	0	0	1	34.4	1	3	209	47	71	87	7.6	4.1	10.4	0
533	1	45.4027	16	0	0	0	1	0	0	0	0	0	0	0	0	0	0	1	0	0	1	0	0	0	35	0	3	92	6	97	254	8.9	5.8	14.3	0
537	1	61.6959	50	0	14	0	2	0	0	0	1	0	1	0	1	0	0	1	0	0	1	0	0	0	36.3	1	3	102	4		569	24.56	2.1	10	0
538	1	73.8	74	0	0	0	3	0	0	1	0	0	0	0	0	0	0	0	0	0	1	0	0	0	35.4	1	3	61	12	81	156	15.20	13	13.1	0
542	1	73.8575	69	0	6	0	3	0	0	0	0	0	0	0	0	0	0	0	0	0	1	0	0	0	36.9	1	14	171	14	43	117	5.52	1.5		1
544	1	74.3342	50	0	2	0	3	0	0	0	0	0	1	0	1	0	0	0	0	0	1	0	0	0	34.6	1	3	702	7	58	491	19.7	3.9	8.8	0
548	1	80.5836	53	1	1	0	2	0	0	0	0	0	1	0	0	0	0	0	0	0	0	1	0	0	39	0	13	115		56	162	11.5	1.8	11.8	0
553	0	47.389	61	0	0	0	3	0	0	0	0	0	1	0	0	0	0	0	0	0	1	0	0	0	36	1	3	89	3	39	340	22.39	2.2	13.3	0
558	1	41.074	52	0	0	0	2	0	0	1	0	1	0	0	0	0	0	0	0	0	1	0	0	0	38.2	0	3	92	6	71	207	9.26	3.6	12.0	0
559	1	72.926	68	1	7	0	3	0	0	0	0	1	1	0	0	0	0	0	0	0	1	0	0	0	36.5	1	3	88	11	43	375	14.32	1	11.6	1
560	1	65.0822	29	0	5	0	3	0	0	0	0	0	1	1	1	0	0	1	0	0	0	1	0	0	35.6	0	11		5	77	484	14	1.1	12	0
564	1	54.7479	73	0	0	0	3	0	0	0	0	0	0	0	1	0	0	0	0	0	1	0	0	0	38.8	1	3	556		82	232	21.3	7.3	15.6	1
566	1	63.3726	51	0	0	0	2	0	0	1	0	0	0	0	0	0	0	0	0	0	1	0	0	0	38.5	1	3	43	16	59	173	22.3	0.9	14.1	0
567	1	53.7726	46	0	3	0	3	0	0	1	0	0	0	0	0	0	0	0	0	0	1	0	0	0	36	1	3	41	1	67	198	9.1	1.3	7.1	0
571	1	49.926	20	0	5	0	1	0	0	0	0	0	0	0	0	0	0	0	0	0	1	0	0	0	40	0	3	66	0	114	271	7.4	2.8	14.9	1
1	1	75.7425	65	0	4	1	4	0	0	0	1	0	0	0	0	0	1	0	0	0	1	0	1	0	38.7	1	3	287					2		1
2	0	79.4712	35	1	6	1	2	0	0	0	0	0	1	0	0	0	0	0	0	0	0	0	1	0	37.2	0	15	78		70	193	14.8	0.8	11.8	0
8	1	65	27	1	2	1	3	0	0	0	0	0	1	0	1	1	0	0	0	0	0	0	0	0		0	15	320		72	34	9.6	3	8.4	0
9	0	69	97	1	15	1	5	0	0	0	0	0	0	0	0	0	0	0	0	1	1	0	0	1	35.7	1	3	146	7	35	131	19.7	6.6	12.5	1
28	1	73	34	1	15	1	2	0	0	0	0	0	1	0	1	0	0	0	0	0	0	0	0	0	38.2	0	15	92	20	31	642	20.5	1.5	11.7	0
35	1	67	94	0	20	1	5	0	0	0	1	0	1	0	1	0	0	0	0	0	1	0	0	1	38.3	1	15	412	9	78	125	13.6	1.1	13.6	0
40	0	68	101	0	2	1	5	0	0	0	0	0	1	0	1	0	0	1	0	0	1	0	0	1	38.2	1	3	137	9	49	271	16.8	12.2	10.6	0
45	0	64	55	1	2	1	3	0	0	0	1	0	0	0	1	0	0	0	0	0	1	0	0	0	38.2	1	15	43	4	63	182	6.8	1.4	11.8	0
47	1	68	35	1	3	1	4	0	0	0	0	0	1	0	1	0	0	0	0	0	1	0	0	0	38.4	1	15	135	8	59	129	1.5	3.5	12	0
49	1	67	72	0	2	1	4	0	0	0	1	0	1	0	1	0	0	0	0	0	1	0	0	1	37.5	0	15	412	9	78	125	22.6	1.1	13.2	0
51	0	44	35	0	7	1	3	0	0	0	1	0	0	0	0	0	0	0	0	0	1	0	0	0	39.5	0	12	75	5	97	105	8	0.8	13	0
53	1	63	45	1	6	1	3	0	0	0	0	0	0	0	1	0	0	0	0	0	1	0	0	0	39	0	15	117				6.2			0
54	1	73	45	0	3	1	3	0	0	0	1	0	1	0	1	0	0	0	0	0	1	0	0	0	39.5	0	15	115	22	79	242	9.6	0.8	13.5	0
55	1	63	59	0	4	1	1	1	0	0	0	0	0	0	0	0	0	0	0	0	0	0	0	0	39.6	0	15	188	26	80	65	2.6	1.2	11	0
56	0	56	33	1	3	1	2	0	0	0	0	0	1	0	1	0	0	0	0	0	1	0	0	0		0	15	61		82	139	12.3	2.2	12.3	0
57	1	44	37	0	5	1	3	0	0	0	0	0	0	0	0	0	0	0	0	0	1	0	0	0	40	1	15	63	15	100	91	4.9	2.5	15.4	0
59	1	71	52	0	3	1	3	0	0	0	1	0	1	0	0	0	0	0	0	0	1	0	0	0	37.3	1	15	100	3	89	70	5	1.8	13.4	0
61	1	48	44	0	2	1	3	0	0	0	0	0	0	0	0	0	0	0	0	0	1	0	0	0	38.5	1	15	81		92	75	4.1	0.9	11.1	0
62	1	46	43	1	15	1	4	0	0	0	0	0	0	0	0	0	0	0	0	1	1	0	0	0	39	1	15	81		65	374	21.9	1.5	9.9	0
64	0	37	59	0	2	1	2	0	0	1	0	0	0	0	0	0	0	0	0	0	1	0	0	0	38.6	1	15	53	37	27	130	7.6	9.9	9.5	0
65	1	44	37	1	5	1	3	0	0	0	0	0	0	0	0	0	0	0	0	0	1	0	0	0	40	1	15	63		100	91	4.9	2	15.4	0
66	1	71	37	0	3	1	3	0	0	0	1	0	0	0	1	0	0	0	0	0	1	0	0	0	38.5	0	15	65		70	174	10.3	2.2	13.3	1
67	1	62	55	0	3	1	4	1	1	0	0	0	0	0	0	0	1	0	0	0	1	0	0	0	37.4	1	15	77		14	174	3.8		10.6	1
69	1	69	51	0	2	1	3	0	0	0	0	0	0	0	0	0	0	0	0	0	0	0	0	0		0	13	70	24	49	228	11.2		15.7	1
71	1	86	47	0	1	1	3	0	0	0	1	0	1	0	0	0	0	0	0	0	0	1	0	0	38.2	0	15	106	41	43	133	20.5		12.2	1
72	0	57	92	0	1	1	2	0	0	1	0	0	0	1	1	1	0	0	0	0	1	0	0	0	39	1	15	100	114	20	65	7.8	1.9	8.6	1
74	1	44	24	1	4	1	3	0	0	0	0	0	1	0	1	0	0	0	0	0	1	0	0	0	38.4	1	15	62	8	83	114	4.6	2.2	16.6	0
77	0	68	22	1	5	1	3	0	0	0	0	0	1	0	0	0	0	0	0	0	0	1	0	0	38.5	0	15	80	8	57		11.7	11.5		0
80	0	22	39	0	2	1	2	0	0	0	0	0	0	0	0	0	0	0	1	0	1	0	0	0	38.8	0	15	44	3	100	198	6.1		7.8	0
227	1	21	9	1	2	1	0	0	0	0	0	1	0	0	0	0	0	0	0	0	0	0	0	0	38.9	0	15	86		72	241	11.4	1.5	14.6	0
228	0	39	65	1	2	1	3	0	0	0	0	1	0	0	0	0	0	0	0	1	1	0	0	0	38	1	15	120	5	69	103	17.2	1	12.3	0
229	1	35	38	0	2	1	3	0	0	0	0	1	0	0	0	0	0	0	0	0	1	0	0	0	38.1	0	15	102		76	133	3.3	2.3	16.2	0
230	0	60	27	1	3	1	1	0	0	0	0	1	0	0	1	0	0	0	0	0	0	1	0	0	40	0	15					8.1	2.8		0
231	0	46	53	0	1	1	2	0	0	0	0	1	0	0	0	0	0	0	0	0	1	0	0	0	37.5	0	15	57	8	98	380	19.8	2.9	13	0
234	0	26	21	0	2	1	1	0	0	0	0	1	0	0	0	0	0	0	1	0	0	0	0	0	39	0	15	52	10		264	8.4	2.3	10.3	0
235	0	29	17	1	5	1	3	0	0	0	0	1	0	0	0	0	0	0	0	1	1	0	0	0	38.1	0	15	55	5	92	132	17.8	1.3	13.8	0
236	1	43	39	0	1	1	2	0	0	0	0	1	0	0	0	0	0	0	0	0	1	0	0	0	37.4	1	15	80	14	79	137	3.9	7.8	14.8	0
252	0	82.074	67	1	7	1	2	0	0	0	0	0	1	0	0	0	0	1	0	0	1	0	0	0	36.7	0	14	111	11				2.3		1
253	1	61.9397	49	1	0	1	4	0	0	0	0	0	1	0	0	0	0	0	0	1	1	0	0	0	35.9	1	3	63		56	97	14	3.2	10	1
254	0	61.9452	72	1	1	1	4	0	1	0	0	1	1	0	1	0	1	0	0	0	1	0	0	0	37	1	3	133	10	53	218	14.68	5.3	12.5	1
256	0	59.8493	54	0	1	1	3	0	0	0	0	1	1	0	1	0	0	1	0	0	1	0	0	0	36.6	1	10	237	6	91	186	8.86	1	10.1	0
257	1	73.7534	62	0	18	1	5	1	0	0	1	0	1	0	0	0	1	0	0	0	1	0	0	0	36.5	1	3	138	6	73	173	16.39	0.8	11.4	1
258	1	72.1562	24	0	5	1	1	1	1	1	0	0	1	0	0	0	0	0	0	0	0	0	0	0	39.4	0	15	62			171	9.9	1.2	13.6	0
263	1	50.2329	58	0	2	1	4	0	0	1	0	0	1	0	0	0	0	0	0	0	1	0	0	0	36.1	1	3	113		86	92	10.6	1.9	17.6	0
264	1	56.5096	26	1	10	1	2	0	0	1	0	0	1	0	0	0	0	0	0	0	0	1	1	0	36.3	1	15	61	13	80	175	5.6	1.9	16.5	0
265	1	45.8411	50	1	6	1	2	0	0	0	0	0	1	0	0	0	0	0	0	0	0	0	1	0	39	0	15	104		100	181	9.8	2.1	18	0
266	1	62.0603	35	1	8	1	3	0	1	0	0	0	1	0	0	0	0	0	0	0	1	0	0	0	39.5	1	3	61	8	74	221	9.8	1	11.7	0
268	0	62.4356	58	0	4	1	3	0	0	1	0	0	1	0	1	0	0	1	0	0	0	1	0	0	38.4	0	14	134			135	5.92	1.7	13.2	0
269	1	82.526	41	0	1	1	3	0	0	0	0	0	1	0	1	0	0	1	0	0	0	1	0	0	38.3	0	14	148	5	94	204	7	0.7	10.3	0
270	0	55.7342	23	1	2	1	1	1	1	0	0	0	1	0	0	0	0	0	0	0	0	0	0	0	37.1	0	15	64	5	100	271	14.5	2.6	13.1	0
271	0	73.7151	67	1	1	1	3	1	1	0	0	0	1	1	1	0	1	0	0	0	1	0	0	1		0	15	317	3	82	247	13.7	1	8	1
272	0	74.1945	29	1	6	1	3	0	0	0	0	0	1	0	1	0	0	0	0	0	1	0	0	0	39.3	0	15	106	7	95	145	6.3		13	1
274	1	41.9479	19	0	0	1	2	0	0	1	0	0	1	0	0	0	0	0	0	0	0	0	0	0	37.1	0	15	101		79	213	13.6	1.2	13.8	0
275	0	79.9342	44	1	1	1	3	0	0	0	0	0	1	0	1	0	0	0	0	0	1	0	0	0	34.5	1	3	106	4	81	242	11.79	2.2	8.3	0
276	0	74.3973	44	1	5	1	4	0	0	1	0	0	1	0	1	0	0	0	0	0	0	1	0	0	35.2	1	14	256	13	100	179	15.15	2.7	11.5	1
277	1	57.7534	35	1	5	1	3	0	0	0	0	0	1	0	0	0	0	0	0	0	1	0	0	0	37.2	1	3	52	6	69	143	4.73	1.3	12.5	0
278	1	48.7616	39	1	4	1	2	0	0	0	0	0	1	0	1	0	0	0	0	0	1	0	0	0	37.4	1	3	75	15	63	76	4.98	2.6	12.4	0
279	1	75.4329	56	1	7	1	4	0	0	0	0	0	1	0	1	0	0	1	0	0	1	0	0	0	35.5	1	3	108	10	71	219	13.88	1.8	12.8	1
280	1	53.411	63	1	7	1	4	0	0	1	0	0	1	0	1	0	0	0	0	1	1	0	0	0	38.7	1	3	253	6	46	239	2.68	3.5	12.9	0
281	0	55.8959	33	1	6	1	2	0	0	0	0	0	1	0	1	0	0	0	0	0	0	0	0	1	36.1	0	15	1110							0
282	1	78.7534	87	0	7	1	2	0	0	0	1	0	1	1	0	0	1	0	0	0	0	1	0	1		0	15	530	12	34	283	64.3	9.7	11.3	1
283	1	62.4384	41	1	4	1	2	0	1	0	1	0	1	0	1	0	0	0	0	0	0	1	0	0	39	0	15	122		107	165	6.8	1	14.4	0
284	0	58.1452	27	1	2	1	1	0	0	0	0	0	1	0	0	0	0	0	0	0	0	0	0	0	39	0	15	101		87	282	26.6	1.5	16.2	0
285	0	48.337	34	1	2	1	2	0	0	0	1	0	1	0	0	0	0	0	0	0	1	0	0	0	36.1	0	3	66	4	87	146	26.28	1.7	12.2	0
286	0	88.9945	33	0	2	1	3	0	0	0	1	0	1	0	0	0	0	0	0	0	0	1	0	0	38.1	0	14	42	4	89	218	18.9	1.2	11.5	0
287	0	69.7918	36	0	0	1	2	0	0	0	0	0	1	1	1	0	0	1	0	0	0	1	0	1	38.3	0	15	294	5	77	169	7.05	1.8	9.8	0
289	0	64.4055	29	0	2	1	2	0	0	0	0	0	1	0	0	0	0	1	0	0	0	1	1	0	37.2	0	14	89	12	46	175	5.71	1.1	13	1
290	0	64.9342	59	0	0	1	5	0	0	0	0	0	1	0	1	0	0	0	0	0	1	0	0	1	35.5	1	3	772	8	22	309	16.94	16.3	10.1	0
291	1	46.2658	19	0	1	1	1	0	0	0	0	0	1	0	0	0	0	0	0	0	0	1	0	0	36.7	0	12	72	8	80	243	9.75	1.4	11.2	0
293	0	59.3014	42	0	0	1	1	0	0	0	0	0	1	0	1	0	0	1	0	0	0	1	0	0	35.8	0	15	159	16	18	142	5.5	0.4	14	1
294	1	85.0356	58	1	1	1	4	0	0	0	0	0	1	0	1	0	0	1	0	0	0	1	0	0	36.4	1	3	114	8	69	215	14.55	1.6	10.5	1
452	0	54.3479	25	1	4	1	1	0	0	0	1	0	0	0	0	0	0	0	0	0	0	0	0	0	40.6	0	15	71		102	158	5.2	0.9	12.3	0
453	0	65.189	21	1	3	1	2	0	0	0	0	0	0	0	0	0	0	0	0	0	0	0	0	0	39.4	0	15	70	31	87	301	6.1	1.4	14.1	0
525	0	56.6767	24	1	10	1	2	0	0	0	0	0	0	0	0	0	0	0	0	0	1	0	0	0	36.8	1	3	56	7	40	525	20.69	7.3	8.2	1
529	1	52.5534	31	1	7	1	1	0	0	0	0	0	0	0	0	0	0	1	0	0	0	1	1	0		0	15	102	19	85	157	10.9	2.7	12.8	0
557	1	55.7041	33	0	1	1	0	0	0	0	1	0	0	0	0	0	0	0	0	0	0	1	0	0	38.2	0	15	55		83	216	12.2	0.6	13.5	0
569	1	72.6329	57	1	10	1	2	0	0	1	1	0	0	0	0	0	0	1	0	0	0	1	0	1	37.1	1	15	1	9	1	18	4.59	2	16.9	0
317	1	48.5671	24	1	5	1	1	0	0	0	0	0	0	0	0	0	0	0	0	0	0	0	1	0	37.3	0	15	61		103	120	5.1	1.5	14.2	0
515	1	60.3342	60	0	10	1	3	0	0	1	0	0	0	0	1	0	0	0	0	0	1	1	1	1	38.5	1	3	280	10	100	54	5.87	1.3	17.8	0
518	0	51.074	45	1	8	1	2	0	0	0	0	0	0	0	0	0	0	0	0	0	0	0	0	0	36.8	0	15	255		74	117	3.8	7.1	16.3	0

## Sheet: rainfall
				January 2016	February 2016	March 2016	April 2016	May 2016	June 2016	July 2016	August 2016	September 2016	October 2016	November 2016	December 2016	January 2017	February 2017	March 2017	April 2017	May 2017	June 2017	July 2017	August 2017	September 2017	October 2017	November 2017	December 2017	January 2018	February 2018	March 2018	April 2018	May 2018	June 2018	July 2018	August 2018	September 2018	October 2018	November 2018	December 2018
			Average rainfall (mm)	90	196	120	60	30	30	30	30	30	30	60	60	30	168	210	150	90	30	60	60	30	30	90	90	390	224	240	300	60	60	30	30	30	60	120	60

## Sheet: kaplan Meyer
				Unknown	Streptococcus pneumoniae	Haemophilus influenzae	Intracellular pathogens	Enterobacteriaceae	Non-fermenting gram-negative bacilli	Stahylococcus aureus	Influenza viruses	Non-Influenza viruses	Death on day	Death on day 30
				0	1	0	0	0	0	0	0	0	1	1
				0	0	0	0	1	0	0	0	0	1	1
				0	0	0	0	0	0	0	1	0	1	1
				0	0	0	0	1	0	0	0	0	1	1
				0	0	0	0	0	1	0	1	0	1	1
				0	0	0	0	0	1	0	0	0	1	1
				1	0	0	0	0	0	0	0	0	1	1
				1	0	0	0	0	0	0	0	0	1	1
				1	0	0	0	0	0	0	0	0	1	1
				1	0	0	0	0	0	0	0	0	1	1
				1	0	0	0	0	0	0	0	0	1	1
				1	0	0	0	0	0	0	0	0	1	1
				1	0	0	0	0	0	0	0	0	1	1
				0	0	0	0	0	0	0	1	0	2	1
				0	0	0	0	0	0	0	1	0	2	1
				0	0	0	0	0	1	0	0	0	2	1
				0	0	1	0	0	0	0	0	0	2	1
				0	0	0	0	0	1	0	0	1	2	1
				0	0	0	0	0	0	1	0	0	2	1
				0	0	0	0	0	0	1	1	0	2	1
				0	0	0	0	0	0	1	1	1	2	1
				0	0	0	0	0	0	1	0	0	2	1
				0	0	0	0	0	0	0	1	0	2	1
				0	0	0	0	1	0	0	0	0	2	1
				0	1	0	0	0	0	0	0	0	2	1
				0	1	0	0	0	0	0	1	0	2	1
				0	1	0	0	0	0	0	1	0	2	1
				0	0	0	1	0	0	0	0	0	2	1
				1	0	0	0	0	0	0	0	0	2	1
				1	0	0	0	0	0	0	0	0	2	1
				1	0	0	0	0	0	0	0	0	2	1
				1	0	0	0	0	0	0	0	0	2	1
				0	0	0	0	0	0	0	1	0	3	1
				0	1	1	0	1	1	0	0	0	3	1
				0	1	0	0	0	0	0	0	0	3	1
				0	0	0	0	0	0	0	0	1	3	1
				0	0	0	0	1	0	0	0	0	3	1
				0	0	0	0	1	0	0	0	0	3	1
				0	1	0	0	0	0	0	0	0	3	1
				0	1	0	0	0	0	0	0	0	3	1
				0	1	0	0	0	0	0	0	0	3	1
				0	0	1	0	0	0	0	1	0	3	1
				0	0	0	1	0	0	0	0	0	3	1
				0	0	0	1	0	0	0	0	0	3	1
				1	0	0	0	0	0	0	0	0	3	1
				1	0	0	0	0	0	0	0	0	3	1
				1	0	0	0	0	0	0	0	0	3	1
				1	0	0	0	0	0	0	0	0	3	1
				0	0	0	0	0	0	0	1	0	4	1
				0	0	1	0	0	0	0	0	0	4	1
				0	0	0	0	0	0	0	1	0	4	1
				0	0	0	0	0	0	0	1	0	4	1
				0	0	0	0	0	0	0	1	0	4	1
				0	0	0	0	0	1	0	0	0	4	1
				0	1	0	0	0	0	0	0	0	4	1
				0	0	0	1	0	0	0	0	0	4	1
				1	0	0	0	0	0	0	0	0	4	1
				1	0	0	0	0	0	0	0	0	4	1
				1	0	0	0	0	0	0	0	0	4	1
				1	0	0	0	0	0	0	0	0	4	1
				1	0	0	0	0	0	0	0	0	4	1
				1	0	0	0	0	0	0	0	0	4	1
				0	0	0	0	0	0	0	1	0	5	1
				0	0	0	0	1	0	0	0	0	5	1
				0	1	0	0	0	0	0	0	0	5	1
				0	0	0	0	0	0	0	1	0	5	1
				0	0	0	0	1	0	1	0	0	5	1
				0	1	0	0	0	0	0	1	0	5	1
				0	0	0	0	1	0	0	0	0	5	1
				0	0	0	1	0	0	0	0	0	5	1
				1	0	0	0	0	0	0	0	0	5	1
				1	0	0	0	0	0	0	0	0	5	1
				0	0	0	0	0	0	0	1	0	6	1
				0	0	0	0	1	0	0	0	0	6	1
				0	1	0	0	0	0	0	0	0	6	1
				1	0	0	0	0	0	0	0	0	6	1
				0	0	0	0	1	0	0	0	0	7	1
				0	0	1	0	0	0	0	0	1	7	1
				0	0	0	0	0	0	0	1	0	7	1
				0	0	0	0	0	0	0	0	1	7	1
				0	0	0	0	0	0	0	1	0	7	1
				0	0	0	0	1	0	0	0	0	7	1
				0	1	0	0	0	0	0	0	0	7	1
				1	0	0	0	0	0	0	0	0	7	1
				1	0	0	0	0	0	0	0	0	7	1
				1	0	0	0	0	0	0	0	0	7	1
				1	0	0	0	0	0	0	0	0	7	1
				0	0	0	0	0	0	0	0	1	8	1
				0	0	0	0	0	1	0	0	0	8	1
				0	1	0	0	0	0	0	0	0	8	1
				0	0	0	0	1	0	0	0	0	8	1
				1	0	0	0	0	0	0	0	0	8	1
				1	0	0	0	0	0	0	0	0	8	1
				0	1	0	0	0	0	0	0	0	9	1
				0	0	0	0	0	0	1	0	0	9	1
				0	0	0	0	0	0	0	0	1	9	1
				0	0	0	0	0	0	0	1	0	9	1
				0	0	0	0	1	0	0	0	0	9	1
				0	0	0	0	0	0	1	0	0	9	1
				0	0	0	0	0	0	1	1	0	9	1
				0	0	0	1	0	0	0	0	0	9	1
				0	0	0	0	0	0	1	0	0	10	1
				0	0	0	0	1	0	0	0	0	10	1
				0	0	0	0	0	0	0	1	0	11	1
				0	0	0	0	0	1	0	0	0	11	1
				0	1	0	0	0	0	0	0	0	11	1
				0	0	0	0	0	0	0	1	0	12	1
				0	0	0	0	1	0	0	0	0	12	1
				1	0	0	0	0	0	0	0	0	12	1
				0	0	0	0	0	0	0	0	1	14	1
				0	1	0	0	0	0	0	0	0	14	1
				0	0	0	0	0	0	0	1	0	14	1
				0	0	0	0	0	1	0	0	0	14	1
				0	0	0	0	0	0	1	1	0	15	1
				0	0	0	0	0	0	1	1	0	15	1
				0	0	0	0	0	1	0	0	0	15	1
				1	0	0	0	0	0	0	0	0	15	1
				1	0	0	0	0	0	0	0	0	15	1
				0	0	0	0	0	0	1	0	0	18	1
				0	0	0	0	0	0	1	0	0	18	1
				0	0	1	0	0	0	0	0	0	19	1
				1	0	0	0	0	0	0	0	0	20	1
				1	0	0	0	0	0	0	0	0	20	1
				0	0	0	0	0	0	0	1	0	21	1
				0	0	0	0	1	0	0	0	0	21	1
				0	0	0	0	1	0	0	0	0	21	1
				0	0	0	0	1	0	0	0	0	22	1
				0	1	0	0	0	0	0	1	0	24	1
				0	1	0	0	0	0	0	0	0	24	1
				1	0	0	0	0	0	0	0	0	24	1
				1	0	0	0	0	0	0	0	0	25	1
				0	0	0	0	0	0	0	1	0	26	1
				1	0	0	0	0	0	0	0	0	27	1
				0	0	0	0	0	0	0	1	0		0
				1	0	0	0	0	0	0	0	0		0
				1	0	0	0	0	0	0	0	0		0
				0	0	0	0	0	1	0	0	0		0
				0	0	0	0	1	0	0	0	0		0
				0	0	0	0	1	0	0	0	0		0
				0	0	1	0	0	0	0	0	0		0
				0	0	1	0	0	0	0	0	0		0
				0	0	0	0	0	1	0	0	0		0
				0	1	0	0	0	0	0	1	0		0
				0	0	0	0	0	0	1	0	0		0
				0	0	0	0	0	0	0	1	0		0
				0	0	0	0	1	0	0	0	0		0
				1	0	0	0	0	0	0	0	0		0
				0	0	1	0	0	0	0	0	0		0
				0	0	1	0	0	0	0	0	0		0
				0	0	0	0	0	0	0	1	0		0
				0	0	0	0	0	0	0	1	0		0
				0	0	0	0	0	0	0	1	0		0
				0	0	0	0	0	0	0	0	1		0
				0	0	0	0	0	0	0	1	0		0
				0	0	0	0	0	0	0	0	1		0
				0	0	1	0	0	0	0	0	0		0
				0	0	0	0	0	0	0	0	1		0
				0	0	0	0	0	0	0	0	1		0
				0	0	0	0	0	0	0	0	1		0
				0	1	0	0	0	0	0	0	0		0
				0	0	0	0	0	0	0	0	1		0
				0	0	0	0	0	0	0	1	0		0
				0	0	0	0	0	0	0	0	1		0
				0	0	0	0	0	0	0	1	0		0
				0	0	0	0	0	0	0	0	1		0
				0	0	0	0	0	0	0	1	0		0
				0	0	0	0	0	0	0	0	1		0
				0	0	0	0	0	0	0	1	0		0
				0	0	0	0	0	0	0	1	0		0
				0	1	0	0	0	0	0	0	0		0
				0	0	0	0	0	0	0	1	0		0
				0	0	0	0	0	0	0	1	0		0
				0	0	0	0	0	0	0	1	0		0
				0	0	0	0	0	0	0	1	0		0
				0	0	0	0	0	0	0	1	0		0
				0	0	0	0	0	0	0	1	0		0
				0	0	0	0	0	0	0	1	0		0
				0	0	0	0	0	0	0	1	0		0
				0	0	0	0	0	0	1	0	0		0
				0	0	0	0	0	0	0	1	0		0
				0	0	0	0	0	0	0	1	0		0
				0	0	0	0	0	0	0	1	0		0
				0	0	0	0	0	0	0	0	1		0
				0	0	0	0	0	0	0	1	0		0
				0	0	0	0	0	0	0	0	1		0
				0	0	0	0	0	0	0	1	0		0
				0	0	0	0	0	0	0	0	1		0
				0	0	0	0	0	1	0	0	0		0
				0	0	0	0	1	0	0	0	0		0
				0	0	0	0	1	0	0	0	0		0
				0	0	0	0	1	0	0	0	0		0
				0	0	0	0	1	0	0	0	0		0
				0	0	0	0	1	0	0	0	0		0
				0	0	0	0	1	0	0	0	0		0
				0	0	0	0	1	0	0	0	0		0
				0	0	1	0	0	0	0	0	0		0
				0	0	1	0	0	0	0	0	1		0
				0	0	1	0	0	0	0	0	0		0
				0	0	1	0	0	0	0	0	0		0
				0	0	1	0	0	0	0	0	1		0
				0	1	1	0	0	0	0	0	0		0
				0	0	1	0	0	0	0	0	0		0
				0	0	1	0	0	0	0	0	0		0
				0	0	1	0	0	0	0	0	1		0
				0	0	1	0	0	0	0	0	0		0
				0	0	1	0	0	0	0	0	0		0
				0	0	1	0	0	0	0	0	0		0
				0	0	0	0	1	0	0	0	0		0
				0	0	0	0	1	0	0	0	0		0
				0	0	0	0	1	0	0	0	1		0
				0	0	0	0	1	0	0	0	0		0
				0	0	0	0	1	0	0	0	0		0
				0	0	0	0	1	0	0	1	0		0
				0	0	0	0	1	0	0	0	1		0
				0	0	0	0	0	1	0	0	0		0
				0	0	0	0	0	1	0	0	0		0
				0	1	0	0	0	0	0	0	0		0
				0	1	0	0	0	0	0	0	0		0
				0	1	0	0	0	0	0	0	0		0
				0	1	0	0	0	0	0	0	0		0
				0	1	0	0	0	0	0	0	0		0
				0	1	0	0	0	0	0	0	0		0
				0	1	0	0	0	0	0	0	0		0
				0	1	0	0	0	0	0	1	0		0
				0	1	0	0	0	0	0	0	0		0
				0	1	0	0	0	0	0	0	0		0
				0	1	1	0	0	0	0	1	0		0
				0	1	0	0	0	0	0	0	0		0
				0	1	0	0	0	0	0	0	0		0
				0	1	0	0	0	0	0	0	0		0
				0	1	0	0	0	0	0	0	0		0
				0	1	0	0	0	0	0	1	0		0
				0	1	0	0	0	0	0	0	0		0
				0	1	0	0	0	0	0	0	0		0
				0	0	0	0	0	1	0	0	0		0
				0	0	0	0	0	1	0	0	0		0
				0	0	0	0	0	0	1	1	0		0
				0	0	0	0	0	0	1	0	0		0
				0	0	0	0	0	0	1	0	0		0
				0	0	0	0	0	0	1	0	0		0
				0	0	0	0	0	0	1	0	0		0
				0	0	0	0	0	0	1	0	0		0
				0	0	0	0	0	0	1	0	0		0
				0	1	0	0	0	0	1	0	0		0
				0	0	0	0	0	0	1	1	0		0
				0	0	0	0	0	0	1	0	0		0
				0	0	1	0	0	0	1	0	0		0
				0	0	0	0	0	0	1	1	0		0
				0	0	0	0	0	0	1	0	0		0
				0	0	0	0	0	0	1	0	0		0
				0	0	0	0	0	0	1	0	0		0
				0	0	0	0	0	0	0	0	1		0
				0	0	0	0	0	0	0	0	1		0
				0	0	0	0	0	0	0	1	0		0
				0	0	0	0	0	0	0	1	0		0
				0	0	0	0	0	0	0	1	0		0
				0	0	0	0	0	0	0	1	0		0
				0	0	0	0	0	0	0	1	0		0
				0	0	0	0	0	0	0	0	1		0
				0	0	0	0	0	0	0	0	1		0
				0	0	0	0	0	0	0	1	0		0
				0	0	0	0	0	0	0	1	0		0
				0	0	0	0	0	0	0	1	0		0
				0	0	1	0	0	0	1	1	0		0
				0	0	0	0	1	0	0	0	0		0
				0	1	0	0	0	0	0	0	0		0
				0	1	0	0	0	0	0	0	0		0
				0	1	0	0	0	0	0	1	0		0
				0	0	0	0	0	0	1	0	0		0
				0	0	0	0	0	0	0	0	1		0
				0	0	0	0	0	0	0	1	0		0
				0	0	0	0	0	0	0	1	0		0
				0	0	0	0	0	0	0	0	1		0
				0	0	0	0	0	0	0	0	1		0
				0	0	0	0	0	0	0	0	1		0
				0	0	0	0	0	0	0	0	1		0
				0	0	0	0	0	0	0	1	0		0
				0	0	0	0	0	0	0	1	0		0
				0	0	0	0	0	0	0	1	0		0
				0	0	0	0	0	0	0	1	0		0
				0	0	0	0	0	0	0	0	1		0
				0	0	0	0	0	0	0	1	0		0
				0	0	0	0	0	0	0	1	0		0
				0	0	0	0	0	0	0	1	0		0
				0	0	0	0	0	0	0	0	1		0
				0	0	0	0	0	0	0	1	0		0
				0	0	0	0	0	0	0	1	0		0
				0	0	0	0	0	0	0	1	0		0
				0	0	0	0	0	0	0	1	0		0
				0	0	0	0	0	0	0	1	0		0
				0	0	0	0	0	0	0	1	0		0
				0	0	0	0	0	0	0	1	0		0
				0	0	0	0	0	0	0	1	0		0
				0	0	0	0	0	0	0	1	0		0
				0	0	0	0	0	0	0	1	0		0
				0	0	0	0	0	0	0	1	0		0
				0	0	0	0	0	0	0	1	0		0
				0	0	0	0	0	0	0	0	1		0
				0	0	0	0	0	1	0	0	0		0
				0	0	0	0	0	1	0	0			0
				0	0	0	0	0	1	0	0	0		0
				0	0	0	0	0	1	0	0	0		0
				0	0	0	0	1	0	0	0	0		0
				0	0	0	0	1	0	0	0	0		0
				0	0	0	0	1	0	0	0	0		0
				0	0	0	0	1	0	0	0	0		0
				0	0	0	0	1	0	0	0	0		0
				0	0	0	0	1	0	0	0	0		0
				0	0	0	0	1	0	0	1	0		0
				0	0	0	0	0	0	0	1	0		0
				0	0	1	0	0	0	0	0	0		0
				0	0	1	0	0	0	0	0	0		0
				0	0	1	0	0	0	0	0	1		0
				0	0	1	0	0	0	0	0	0		0
				0	0	1	0	0	0	0	0	0		0
				0	0	1	0	0	0	0	0	0		0
				0	0	1	0	0	0	0	0	0		0
				0	0	1	0	0	0	0	0	0		0
				0	0	0	0	1	0	0	0	0		0
				0	0	0	0	1	0	0	0	0		0
				0	0	0	0	1	0	0	0	0		0
				0	0	0	0	1	1	0	0	0		0
				0	0	0	0	0	0	0	1	0		0
				0	0	0	0	0	0	0	1	0		0
				0	0	1	0	0	1	0	0	0		0
				0	0	0	0	0	1	0	0	0		0
				0	0	0	0	0	1	0	1	0		0
				0	0	0	0	0	1	0	0	0		0
				0	1	0	0	0	0	0	0	0		0
				0	1	0	0	0	0	0	0	0		0
				0	1	0	0	0	0	0	1	0		0
				0	1	0	0	0	0	0	0	0		0
				0	1	0	0	0	0	0	0	0		0
				0	1	0	0	0	0	0	0	0		0
				0	1	0	0	0	0	0	0	0		0
				0	1	0	0	0	0	0	0	0		0
				0	1	0	0	0	0	0	0	0		0
				0	1	0	0	0	0	0	1	0		0
				0	1	0	0	0	0	0	0	1		0
				0	1	0	0	0	0	0	0	0		0
				0	1	0	0	0	0	0	0	0		0
				0	1	0	0	0	0	0	1	0		0
				0	1	0	0	0	0	0	1	0		0
				0	1	0	0	0	0	0	1	0		0
				0	1	0	0	0	0	1	0	0		0
				0	0	0	0	1	0	1	0	0		0
				0	0	0	0	1	0	0	0	0		0
				0	0	0	0	0	0	1	1	0		0
				0	0	0	0	0	0	1	1	0		0
				0	0	0	0	0	0	1	0	0		0
				0	0	0	0	0	0	1	0	0		0
				0	0	1	0	0	0	1	1	0		0
				0	0	0	0	1	0	1	0	0		0
				0	0	0	0	0	0	1	0	0		0
				0	0	0	0	0	0	1	1	0		0
				0	0	0	0	0	0	1	1	0		0
				0	0	0	0	0	0	1	0	0		0
				0	0	0	0	0	0	1	0	0		0
				0	0	0	0	0	0	1	1	0		0
				0	0	0	0	0	0	1	1	0		0
				0	0	0	0	0	0	1	1	0		0
				0	0	0	0	0	0	1	0	0		0
				0	0	0	0	0	0	1	0	0		0
				0	0	0	0	0	0	1	1	0		0
				0	0	0	0	0	0	0	1	0		0
				0	0	0	0	0	0	0	1	0		0
				0	0	0	0	0	0	1	0	0		0
				0	0	0	0	0	0	1	0	0		0
				0	0	0	0	0	0	1	1	0		0
				0	0	1	0	0	0	0	0	0		0
				0	0	0	0	1	0	0	0	0		0
				0	0	1	0	1	0	0	0	1		0
				0	0	0	0	0	0	0	1	0		0
				0	0	1	0	0	0	1	0	0		0
				0	0	1	0	0	0	0	0	0		0
				0	1	0	0	0	0	0	0	0		0
				0	0	1	0	0	0	1	1	0		0
				0	0	0	0	0	0	1	1	0		0
				0	1	0	0	0	0	0	0	0		0
				0	0	1	0	0	0	0	0	0		0
				0	1	0	0	0	0	0	1	0		0
				0	1	0	0	0	0	1	1	0		0
				0	0	1	0	0	0	0	0	0		0
				0	1	0	0	0	0	1	0	0		0
				0	0	0	0	0	0	1	1	0		0
				0	1	0	0	0	0	0	0	1		0
				0	0	0	0	1	0	0	0	1		0
				0	0	0	0	0	0	1	1	0		0
				0	0	0	0	0	0	0	0	1		0
				0	0	0	0	1	0	0	1	0		0
				0	0	0	0	1	0	0	0	0		0
				0	0	0	0	0	0	1	0	0		0
				0	0	0	0	0	0	0	1	0		0
				0	0	0	1	0	0	0	0	0		0
				0	0	0	1	0	0	0	0	0		0
				0	0	0	1	0	0	0	0	0		0
				0	0	0	1	0	0	0	0	0		0
				0	0	0	1	0	0	0	0	0		0
				0	0	0	1	0	0	0	0	0		0
				0	0	0	1	0	0	0	0	0		0
				0	0	0	1	0	0	0	0	0		0
				1	0	0	0	0	0	0	0	0		0
				1	0	0	0	0	0	0	0	0		0
				1	0	0	0	0	0	0	0	0		0
				1	0	0	0	0	0	0	0	0		0
				1	0	0	0	0	0	0	0	0		0
				1	0	0	0	0	0	0	0	0		0
				1	0	0	0	0	0	0	0	0		0
				1	0	0	0	0	0	0	0	0		0
				1	0	0	0	0	0	0	0	0		0
				1	0	0	0	0	0	0	0	0		0
				1	0	0	0	0	0	0	0	0		0
				1	0	0	0	0	0	0	0	0		0
				1	0	0	0	0	0	0	0	0		0
				1	0	0	0	0	0	0	0	0		0
				1	0	0	0	0	0	0	0	0		0
				1	0	0	0	0	0	0	0	0		0
				1	0	0	0	0	0	0	0	0		0
				1	0	0	0	0	0	0	0	0		0
				1	0	0	0	0	0	0	0	0		0
				1	0	0	0	0	0	0	0	0		0
				1	0	0	0	0	0	0	0	0		0
				1	0	0	0	0	0	0	0	0		0
				1	0	0	0	0	0	0	0	0		0
				1	0	0	0	0	0	0	0	0		0
				1	0	0	0	0	0	0	0	0		0
				1	0	0	0	0	0	0	0	0		0
				1	0	0	0	0	0	0	0	0		0
				1	0	0	0	0	0	0	0	0		0
				1	0	0	0	0	0	0	0	0		0
				1	0	0	0	0	0	0	0	0		0
				1	0	0	0	0	0	0	0	0		0
				1	0	0	0	0	0	0	0	0		0
				1	0	0	0	0	0	0	0	0		0
				1	0	0	0	0	0	0	0	0		0
				1	0	0	0	0	0	0	0	0		0
				1	0	0	0	0	0	0	0	0		0
				1	0	0	0	0	0	0	0	0		0
				1	0	0	0	0	0	0	0	0		0
				1	0	0	0	0	0	0	0	0		0
				1	0	0	0	0	0	0	0	0		0
				1	0	0	0	0	0	0	0	0		0
				1	0	0	0	0	0	0	0	0		0
				1	0	0	0	0	0	0	0	0		0
				1	0	0	0	0	0	0	0	0		0
				1	0	0	0	0	0	0	0	0		0
				1	0	0	0	0	0	0	0	0		0
				1	0	0	0	0	0	0	0	0		0
				1	0	0	0	0	0	0	0	0		0
				1	0	0	0	0	0	0	0	0		0
				1	0	0	0	0	0	0	0	0		0
				1	0	0	0	0	0	0	0	0		0
				1	0	0	0	0	0	0	0	0		0
				1	0	0	0	0	0	0	0	0		0
				1	0	0	0	0	0	0	0	0		0
				1	0	0	0	0	0	0	0	0		0
				1	0	0	0	0	0	0	0	0		0
				1	0	0	0	0	0	0	0	0		0
				1	0	0	0	0	0	0	0	0		0
				1	0	0	0	0	0	0	0	0		0
				1	0	0	0	0	0	0	0	0		0
				1	0	0	0	0	0	0	0	0		0
				1	0	0	0	0	0	0	0	0		0
				1	0	0	0	0	0	0	0	0		0
				1	0	0	0	0	0	0	0	0		0
				1	0	0	0	0	0	0	0	0		0
				1	0	0	0	0	0	0	0	0		0
				1	0	0	0	0	0	0	0	0		0
				1	0	0	0	0	0	0	0	0		0
				1	0	0	0	0	0	0	0	0		0
				1	0	0	0	0	0	0	0	0		0
				1	0	0	0	0	0	0	0	0		0
				1	0	0	0	0	0	0	0	0		0
				1	0	0	0	0	0	0	0	0		0
				1	0	0	0	0	0	0	0	0		0
				1	0	0	0	0	0	0	0	0		0
				1	0	0	0	0	0	0	0	0		0
				1	0	0	0	0	0	0	0	0		0
				1	0	0	0	0	0	0	0	0		0
				1	0	0	0	0	0	0	0	0		0
				1	0	0	0	0	0	0	0	0		0
				1	0	0	0	0	0	0	0	0		0
				1	0	0	0	0	0	0	0	0		0
				1	0	0	0	0	0	0	0	0		0
				1	0	0	0	0	0	0	0	0		0
				1	0	0	0	0	0	0	0	0		0
				1	0	0	0	0	0	0	0	0		0
				1	0	0	0	0	0	0	0	0		0
				1	0	0	0	0	0	0	0	0		0
				1	0	0	0	0	0	0	0	0		0
				1	0	0	0	0	0	0	0	0		0
				1	0	0	0	0	0	0	0	0		0
				1	0	0	0	0	0	0	0	0		0
				1	0	0	0	0	0	0	0	0		0
				1	0	0	0	0	0	0	0	0		0
				1	0	0	0	0	0	0	0	0		0
				1	0	0	0	0	0	0	0	0		0
				1	0	0	0	0	0	0	0	0		0
				1	0	0	0	0	0	0	0	0		0
				1	0	0	0	0	0	0	0	0		0
				1	0	0	0	0	0	0	0	0		0
				1	0	0	0	0	0	0	0	0		0
				1	0	0	0	0	0	0	0	0		0
				1	0	0	0	0	0	0	0	0		0
				1	0	0	0	0	0	0	0	0		0
				1	0	0	0	0	0	0	0	0		0
				1	0	0	0	0	0	0	0	0		0
				1	0	0	0	0	0	0	0	0		0
				1	0	0	0	0	0	0	0	0		0
				1	0	0	0	0	0	0	0	0		0
				1	0	0	0	0	0	0	0	0		0
				1	0	0	0	0	0	0	0	0		0
				1	0	0	0	0	0	0	0	0		0
				1	0	0	0	0	0	0	0	0		0
				1	0	0	0	0	0	0	0	0		0
				1	0	0	0	0	0	0	0	0		0
				1	0	0	0	0	0	0	0	0		0
				1	0	0	0	0	0	0	0	0		0
				1	0	0	0	0	0	0	0	0		0
				1	0	0	0	0	0	0	0	0		0
				1	0	0	0	0	0	0	0	0		0
				1	0	0	0	0	0	0	0	0		0
				1	0	0	0	0	0	0	0	0		0
				1	0	0	0	0	0	0	0	0		0
				1	0	0	0	0	0	0	0	0		0
				1	0	0	0	0	0	0	0	0		0
				1	0	0	0	0	0	0	0	0		0
				1	0	0	0	0	0	0	0	0		0
				1	0	0	0	0	0	0	0	0		0
				1	0	0	0	0	0	0	0	0		0
				1	0	0	0	0	0	0	0	0		0
				1	0	0	0	0	0	0	0	0		0
				1	0	0	0	0	0	0	0	0		0
				1	0	0	0	0	0	0	0	0		0
				1	0	0	0	0	0	0	0	0		0
				1	0	0	0	0	0	0	0	0		0
				1	0	0	0	0	0	0	0	0		0
				1	0	0	0	0	0	0	0	0		0
				1	0	0	0	0	0	0	0	0		0
